# Supplementary material for: Theoretical exploration of the forces governing the interaction between gold–phthalocyanine and gold surface clusters
Source: Royal Society of Chemistry journal article supplement (doi:10.1039/c9ra07959a), 2020-01-01
Supplement: c9ra07959a1.pdf [file c9ra07959a1.pdf]

## Theoretical Exploration of the Forces Governing the interaction between Gold-Phthalocyanine and Gold Surface Clusters

Pablo Castro-Latorre,<sup>\*a</sup> Sebastián Miranda-Rojas<sup>\*b</sup> and Fernando Mendizabal<sup>\*a</sup>

<sup>a</sup>Departamento de Química, Facultad de Ciencias, Universidad de Chile, Casilla 653, Santiago, Chile. E-mail: pablo.castro@ug.uchile.cl, hagua@uchile.cl

<sup>b</sup>Departamento de Ciencias Químicas, Facultad de Ciencias Exactas, Universidad Andres Bello, Avenida República 275, Santiago, Chile.

**Table S1.** Interaction energies ( $\Delta E_{\text{int}}$ ) between AuPc, H<sub>2</sub>Pc with Au<sub>n</sub> (n=26, 58) optimized without dispersion correction. The energies are corrected for BSSE (in Kcal/mol). Au<sub>26</sub> is model 1 and Au<sub>58</sub> is model 2.

| System                              | Method  | $\Delta E_{\text{int}}$ |
|-------------------------------------|---------|-------------------------|
| Au <sub>26</sub> -AuPc              | PBE     | 4.4                     |
|                                     | TPSS    | 4.0                     |
|                                     | TPSS-D3 | -76.2                   |
| Au <sub>26</sub> -H <sub>2</sub> Pc | PBE     | 0.8                     |
|                                     | TPSS    | 7.1                     |
|                                     | TPSS-D3 | -63.0                   |
| Au <sub>58</sub> -AuPc              | PBE     | -6.3                    |
|                                     | TPSS    | 2.9                     |
|                                     | TPSS-D3 | -109.2                  |
| Au <sub>58</sub> -H <sub>2</sub> Pc | PBE     | 1.28                    |
|                                     | TPSS    | 10.68                   |
|                                     | TPSS-D3 | -92.0                   |

**Table S2.** Interaction energies ( $\Delta E_{\text{int}}$ ) and energy decomposition analysis for the complexes formed between AuPc and H<sub>2</sub>Pc with Au<sub>n</sub> (n=26, 58). The energies are corrected for BSSE (in Kcal/mol). Au<sub>26</sub> is model 1 and Au<sub>58</sub> is model 2.

| System                              | Method  | $\Delta E_{\text{TOT}}$ | $\Delta E_{\text{ELECT}}$ | $\Delta E_{\text{POL}}$ | $\Delta E_{\text{DISP}}$ |
|-------------------------------------|---------|-------------------------|---------------------------|-------------------------|--------------------------|
| Au <sub>26</sub> -AuPc              | PBE-D3  | -55.3                   | 78.5                      | -72.8                   | -60.9                    |
|                                     | TPSS-D3 | -76.2                   | 92.7                      | -79.7                   | -89.1                    |
| Au <sub>26</sub> -H <sub>2</sub> Pc | PBE-D3  | -45.5                   | 68.8                      | -60.1                   | -54.2                    |
|                                     | TPSS-D3 | -63.0                   | 91.2                      | -75.4                   | -78.9                    |

**Table S3.** Adsorption Energies ( $\Delta E_{\text{int}}$ ) in kcal/mol between MPc and Au<sub>n</sub> (M= Fe, Co, Cu; n = 26, 58) with counterpoise correction (CP). Denoting the two closed M-Au distances in angstroms. Au<sub>26</sub> is model 1 and Au<sub>58</sub> is model 2.

| System                | Method  | M-Au | M-Au | $\Delta E_{\text{int}}$ |
|-----------------------|---------|------|------|-------------------------|
| FePc-Au <sub>26</sub> | PBE     | 3.23 | 3.62 | -3.9                    |
|                       | PBE-D3  | 3.23 | 3.34 | -63.5                   |
|                       | TPSS    | 3.18 | 3.41 | -0.2                    |
|                       | TPSS-D3 | 3.21 | 3.25 | -86.8                   |
| CoPc-Au <sub>26</sub> | PBE     | 3.35 | 3.62 | -3.6                    |
|                       | PBE-D3  | 3.25 | 3.40 | -61.7                   |
|                       | TPSS    | 3.22 | 3.42 | 0.1                     |
| CuPc-Au <sub>26</sub> | PBE     | 3.74 | 3.79 | -31.8                   |
|                       | PBE-D3  | 3.27 | 3.42 | -85.1                   |
|                       | TPSS    | 3.37 | 3.42 | -25.0                   |
|                       | TPSS-D3 | 3.12 | 3.20 | -109.0                  |
| CoPc-Au <sub>58</sub> | PBE     | 3.40 | 3.50 | -3.7                    |
|                       | PBE-D3  | 3.25 | 3.26 | -88.4                   |
|                       | TPSS    | 3.22 | 3.27 | -1.3                    |

|                       |         |      |      |        |
|-----------------------|---------|------|------|--------|
|                       | TPSS-D3 | 3.15 | 3.23 | -120.8 |
| CuPc-Au <sub>58</sub> | PBE     | 3.63 | 3.96 | -42.1  |
|                       | PBE-D3  | 3.25 | 3.36 | -119.9 |
|                       | TPSS    | 3.30 | 3.56 | -33.1  |
|                       | TPSS-D3 | 3.08 | 3.16 | -153.4 |

**Table S4.** Natural Population Atomic (NPA) analysis of the substrate (Au-cluster) and the ligands (AuPc or H<sub>2</sub>Pc). Au<sub>26</sub> is model 1 and Au<sub>58</sub> is model 2.

| System                              | Method  | Au-cluster | Au   | Pc    |
|-------------------------------------|---------|------------|------|-------|
| AuPc                                | PBE-D3  |            | 1.21 | -1.21 |
|                                     | TPSS-D3 |            | 1.24 | -1.24 |
| Au <sub>26</sub> -AuPc              | PBE-D3  | -0.14      | 1.24 | -1.10 |
|                                     | TPSS-D3 | -0.07      | 1.28 | -1.21 |
| Au <sub>26</sub> -H <sub>2</sub> Pc | PBE-D3  | -0.06      |      | 0.06  |
|                                     | TPSS-D3 | 0.00       |      | 0.00  |

**Table S5.** Fragmental electronic chemical potential ( $\mu$ ) of the ligand (AuPc or H<sub>2</sub>Pc) and the gold substrate (Au<sub>26</sub> or Au<sub>58</sub>). The  $\Delta\mu$  was calculated from the difference between the  $\mu$  of the substrate and the ligand. Au<sub>26</sub> is model 1 and Au<sub>58</sub> is model 2.

| System                              | Method  | $\mu_{\text{Au-substrate}}$ | $\mu_{\text{AuPc}}$ | $\Delta\mu$ |
|-------------------------------------|---------|-----------------------------|---------------------|-------------|
| Au <sub>26</sub> -AuPc              | PBE-D3  | -4.82                       | -4.13               | -0.69       |
|                                     | TPSS-D3 | -4.69                       | -4.06               | -0.63       |
| Au <sub>26</sub> -H <sub>2</sub> Pc | PBE-D3  | -4.82                       | -4.71               | -0.11       |
|                                     | TPSS-D3 | -4.70                       | -4.65               | -0.05       |

**Figure S1:** DOS diagram of Au<sub>58</sub>(flat)-AuPc

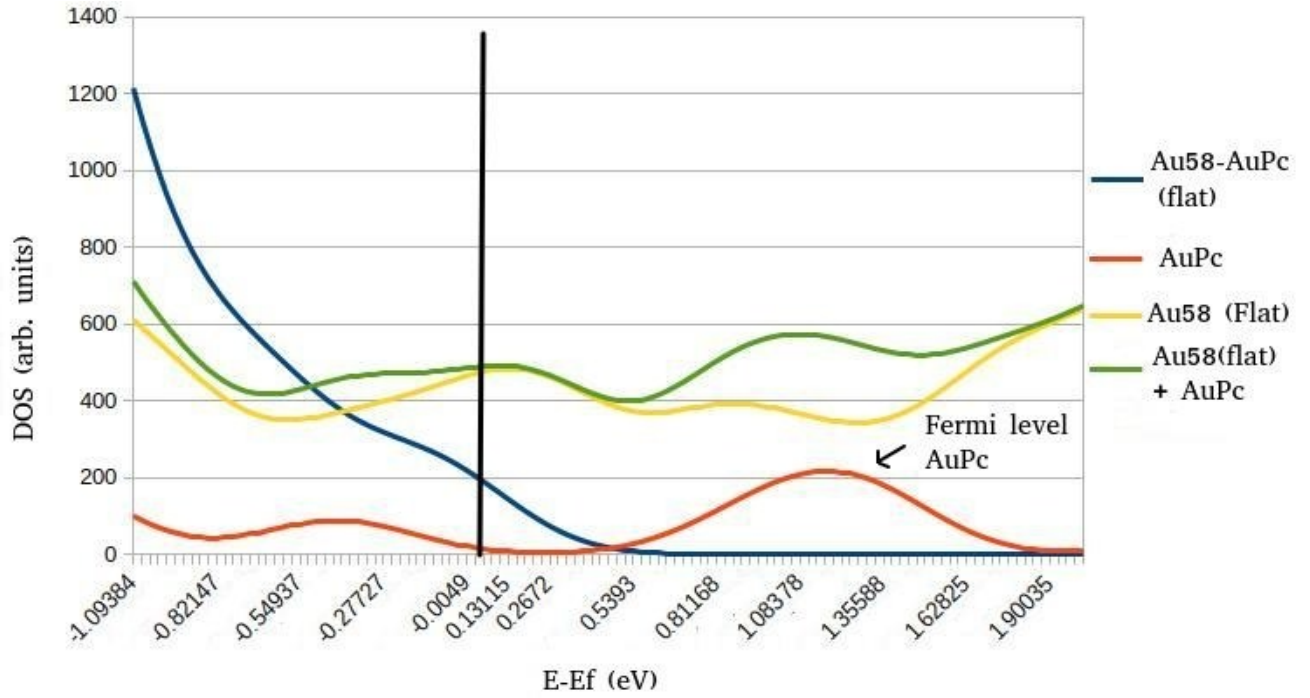

**Figure S2.** DOS diagram of Au<sub>58</sub> clusters

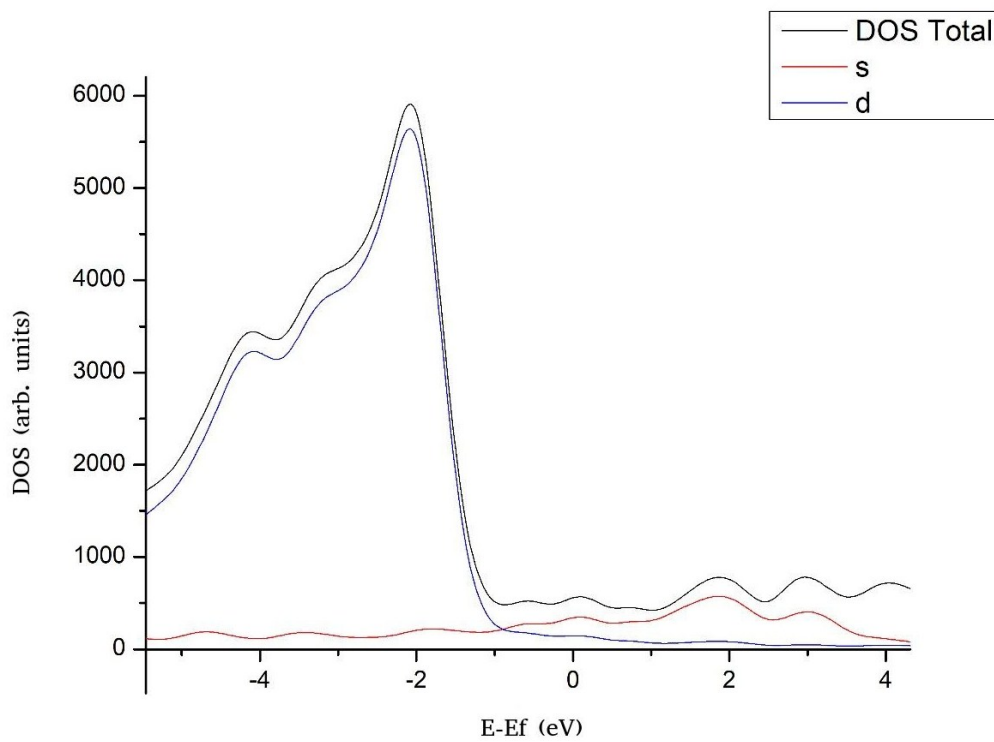

## Systems coordinates (xyz coord)

### Au<sub>26</sub>-AuPc (PBE)

|    |            |            |            |
|----|------------|------------|------------|
| Au | 3.7148940  | -4.7147830 | 0.6487530  |
| Au | 3.7608460  | -1.8311410 | 0.6436810  |
| Au | 3.6710750  | -6.1605980 | -1.8462070 |
| Au | 3.7169670  | -3.2770260 | -1.8513200 |
| Au | 3.7629750  | -0.3934560 | -1.8563520 |
| Au | 3.6271390  | -7.6064830 | -4.3411260 |
| Au | 3.6730900  | -4.7228400 | -4.3461980 |
| Au | 3.7190390  | -1.8393400 | -4.3512700 |
| Au | 3.7649900  | 1.0443020  | -4.3563420 |
| Au | 3.6292110  | -6.1687260 | -6.8411990 |
| Au | 3.6752190  | -3.2851550 | -6.8462310 |
| Au | 3.7211110  | -0.4015830 | -6.8513430 |
| Au | 3.6313400  | -4.7310410 | -9.3412310 |
| Au | 3.6772910  | -1.8473980 | -9.3463040 |
| Au | 1.3466120  | -4.6798690 | -0.9965850 |
| Au | 1.3925610  | -1.7963690 | -1.0016570 |
| Au | 1.3027330  | -6.1257550 | -3.4915860 |
| Au | 1.3487420  | -3.2421840 | -3.4966180 |
| Au | 1.3946340  | -0.3586120 | -3.5017300 |
| Au | 1.3048050  | -4.6880680 | -5.9915370 |
| Au | 1.3507570  | -1.8044260 | -5.9966090 |
| Au | 1.3068780  | -3.2503120 | -8.4916100 |
| Au | -0.9777930 | -3.1992120 | -0.1469230 |
| Au | -1.0216720 | -4.6450970 | -2.6419240 |
| Au | -0.9757210 | -1.7614550 | -2.6469960 |
| Au | -1.0196000 | -3.2073410 | -5.1419970 |
| Au | 7.2939966  | -3.3923570 | -4.3008439 |

|   |           |            |            |
|---|-----------|------------|------------|
| C | 7.1030460 | -5.8043438 | -6.1129049 |
| C | 6.8591125 | -6.1383890 | -7.4960890 |
| C | 6.8742961 | -4.9210151 | -8.2275327 |
| C | 7.1149239 | -3.8601578 | -7.2827750 |
| N | 7.2289908 | -4.4417974 | -6.0435775 |
| C | 7.2727850 | -5.2092514 | -1.8795218 |
| C | 7.2607744 | -6.6285177 | -1.5331530 |
| C | 7.2533448 | -7.3548731 | -2.7410133 |
| C | 7.2466927 | -6.3832207 | -3.8315213 |
| N | 7.2894529 | -5.1351928 | -3.2545769 |
| C | 7.2599890 | -0.9755045 | -2.4852708 |
| C | 7.0690621 | -0.6320161 | -1.0961090 |
| C | 7.0356077 | -1.8498019 | -0.3669424 |
| C | 7.2107664 | -2.9192487 | -1.3166634 |
| N | 7.3230583 | -2.3426629 | -2.5577431 |
| C | 7.2815514 | -1.5742334 | -6.7224982 |
| C | 7.3140832 | -0.1552377 | -7.0689492 |
| C | 7.3624121 | 0.5703671  | -5.8611072 |
| C | 7.3504331 | -0.4012783 | -4.7700494 |
| N | 7.3229958 | -1.6497519 | -5.3479067 |
| N | 7.1878981 | -2.5677434 | -7.5495801 |
| N | 7.1614273 | -6.6494241 | -5.0983659 |
| N | 7.2339481 | -4.2134511 | -1.0505499 |
| N | 7.3229707 | -0.1333047 | -3.5013546 |
| C | 6.7761485 | -1.8522452 | 1.0149708  |
| C | 7.3821571 | 1.9676387  | -5.8603164 |
| C | 7.2801290 | 0.5016062  | -8.3021378 |
| C | 6.5923306 | -4.9081334 | -9.6050415 |
| C | 6.5941743 | -7.3613283 | -8.1385360 |
| C | 7.2230610 | -8.7516902 | -2.7413542 |
| C | 7.2361335 | -7.2836664 | -0.2989299 |

|   |           |            |             |
|---|-----------|------------|-------------|
| C | 6.8799412 | 0.6004779  | -0.4474026  |
| C | 6.6336990 | 0.5933597  | 0.9238452   |
| H | 6.4784420 | 1.5463338  | 1.4557456   |
| C | 6.5712526 | -0.6219444 | 1.6483639   |
| C | 7.3532666 | 2.6246748  | -7.0948015  |
| C | 7.3017069 | 1.9001544  | -8.3013352  |
| H | 7.2763434 | 2.4455480  | -9.2591879  |
| C | 6.3144330 | -6.1282978 | -10.2323957 |
| C | 6.3265292 | -7.3440534 | -9.5058563  |
| H | 6.1145145 | -8.2887667 | -10.0328661 |
| C | 7.2088018 | -8.6819441 | -0.2992411  |
| H | 7.1895833 | -9.2263428 | 0.6593213   |
| C | 7.2032035 | -9.4074984 | -1.5061943  |
| H | 6.9215099 | 1.5398524  | -1.0235949  |
| H | 6.7668204 | -2.8020497 | 1.5756497   |
| H | 7.4198084 | 2.5212685  | -4.9073187  |
| H | 7.2351710 | -0.0791272 | -9.2386205  |
| H | 6.6279642 | -3.9605713 | -10.1686916 |
| H | 6.6027530 | -8.3014258 | -7.5618683  |
| H | 7.3691960 | 3.7266556  | -7.1256688  |
| H | 6.3843747 | -0.5938736 | 2.7350514   |
| H | 6.1144627 | -6.1494929 | -11.3169957 |
| H | 7.2155444 | -9.3064031 | -3.6943706  |

### **Au<sub>26</sub>-AuPc (PBE-D3)**

|    |           |            |            |
|----|-----------|------------|------------|
| Au | 3.7148940 | -4.7147830 | 0.6487530  |
| Au | 3.7608460 | -1.8311410 | 0.6436810  |
| Au | 3.6710750 | -6.1605980 | -1.8462070 |
| Au | 3.7169670 | -3.2770260 | -1.8513200 |
| Au | 3.7629750 | -0.3934560 | -1.8563520 |
| Au | 3.6271390 | -7.6064830 | -4.3411260 |

|    |            |            |            |
|----|------------|------------|------------|
| Au | 3.6730900  | -4.7228400 | -4.3461980 |
| Au | 3.7190390  | -1.8393400 | -4.3512700 |
| Au | 3.7649900  | 1.0443020  | -4.3563420 |
| Au | 3.6292110  | -6.1687260 | -6.8411990 |
| Au | 3.6752190  | -3.2851550 | -6.8462310 |
| Au | 3.7211110  | -0.4015830 | -6.8513430 |
| Au | 3.6313400  | -4.7310410 | -9.3412310 |
| Au | 3.6772910  | -1.8473980 | -9.3463040 |
| Au | 1.3466120  | -4.6798690 | -0.9965850 |
| Au | 1.3925610  | -1.7963690 | -1.0016570 |
| Au | 1.3027330  | -6.1257550 | -3.4915860 |
| Au | 1.3487420  | -3.2421840 | -3.4966180 |
| Au | 1.3946340  | -0.3586120 | -3.5017300 |
| Au | 1.3048050  | -4.6880680 | -5.9915370 |
| Au | 1.3507570  | -1.8044260 | -5.9966090 |
| Au | 1.3068780  | -3.2503120 | -8.4916100 |
| Au | -0.9777930 | -3.1992120 | -0.1469230 |
| Au | -1.0216720 | -4.6450970 | -2.6419240 |
| Au | -0.9757210 | -1.7614550 | -2.6469960 |
| Au | -1.0196000 | -3.2073410 | -5.1419970 |
| Au | 7.0349805  | -3.4078158 | -4.3108346 |
| C  | 6.8816908  | -5.8012976 | -6.1497099 |
| C  | 6.6724392  | -6.1247435 | -7.5409462 |
| C  | 6.6998722  | -4.9007613 | -8.2619865 |
| C  | 6.9014741  | -3.8469544 | -7.3030424 |
| N  | 6.9981692  | -4.4396515 | -6.0658708 |
| C  | 6.9572022  | -5.2471907 | -1.9080281 |
| C  | 6.8244826  | -6.6647885 | -1.5799586 |
| C  | 6.8437535  | -7.3804905 | -2.7950582 |
| C  | 6.9518597  | -6.4014124 | -3.8719048 |
| N  | 7.0300075  | -5.1620066 | -3.2817526 |



|   |           |            |             |
|---|-----------|------------|-------------|
| C | 7.0410480 | -1.0101529 | -2.4693431  |
| C | 6.8868582 | -0.6784652 | -1.0727453  |
| C | 6.8545536 | -1.9035775 | -0.3548200  |
| C | 6.9836563 | -2.9647155 | -1.3184471  |
| N | 7.0867660 | -2.3763437 | -2.5565289  |
| C | 6.9909968 | -1.5651309 | -6.7138527  |
| C | 6.9269536 | -0.1429398 | -7.0406475  |
| C | 6.9790956 | 0.5706081  | -5.8247598  |
| C | 7.0610116 | -0.4124713 | -4.7479874  |
| N | 7.0631121 | -1.6542959 | -5.3404490  |
| N | 6.9305799 | -2.5493789 | -7.5536390  |
| N | 6.8977161 | -6.6567020 | -5.1425902  |
| N | 6.9511737 | -4.2616241 | -1.0674947  |
| N | 7.0658524 | -0.1564922 | -3.4772425  |
| C | 6.5924713 | -1.9191231 | 1.0277518   |
| C | 6.8786690 | 1.9642560  | -5.8014190  |
| C | 6.7718795 | 0.5228632  | -8.2602535  |
| C | 6.4096654 | -4.8739411 | -9.6388384  |
| C | 6.4007849 | -7.3422583 | -8.1914757  |
| C | 6.6765717 | -8.7673508 | -2.8178849  |
| C | 6.6354935 | -7.3218808 | -0.3599808  |
| C | 6.6991975 | 0.5492859  | -0.4140657  |
| C | 6.4569996 | 0.5308773  | 0.9579072   |
| H | 6.2985975 | 1.4785416  | 1.4976735   |
| C | 6.3935656 | -0.6908923 | 1.6726947   |
| C | 6.7251369 | 2.6303575  | -7.0226289  |
| C | 6.6718316 | 1.9183794  | -8.2365935  |
| H | 6.5423574 | 2.4699277  | -9.1822257  |
| C | 6.1271912 | -6.0917404 | -10.2760228 |
| C | 6.1355138 | -7.3138365 | -9.5592553  |
| H | 5.9143603 | -8.2524656 | -10.0925883 |

|   |           |            |             |
|---|-----------|------------|-------------|
| C | 6.4676809 | -8.7105913 | -0.3833310  |
| H | 6.3088511 | -9.2551227 | 0.5620805   |
| C | 6.4899304 | -9.4248799 | -1.5970180  |
| H | 6.7320935 | 1.4915295  | -0.9858109  |
| H | 6.5842636 | -2.8742589 | 1.5796626   |
| H | 6.9176325 | 2.5064264  | -4.8418032  |
| H | 6.7186226 | -0.0515548 | -9.2002755  |
| H | 6.4579187 | -3.9227405 | -10.1954385 |
| H | 6.3967461 | -8.2832970 | -7.6166317  |
| H | 6.6385933 | 3.7292683  | -7.0361682  |
| H | 6.2091265 | -0.6716806 | 2.7599120   |
| H | 5.9285690 | -6.1032280 | -11.3607660 |

#### **Au<sub>26</sub>-AuPc (TPSS)**

|    |           |            |            |
|----|-----------|------------|------------|
| Au | 3.7148940 | -4.7147830 | 0.6487530  |
| Au | 3.7608460 | -1.8311410 | 0.6436810  |
| Au | 3.6710750 | -6.1605980 | -1.8462070 |
| Au | 3.7169670 | -3.2770260 | -1.8513200 |
| Au | 3.7629750 | -0.3934560 | -1.8563520 |
| Au | 3.6271390 | -7.6064830 | -4.3411260 |
| Au | 3.6730900 | -4.7228400 | -4.3461980 |
| Au | 3.7190390 | -1.8393400 | -4.3512700 |
| Au | 3.7649900 | 1.0443020  | -4.3563420 |
| Au | 3.6292110 | -6.1687260 | -6.8411990 |
| Au | 3.6752190 | -3.2851550 | -6.8462310 |
| Au | 3.7211110 | -0.4015830 | -6.8513430 |
| Au | 3.6313400 | -4.7310410 | -9.3412310 |
| Au | 3.6772910 | -1.8473980 | -9.3463040 |
| Au | 1.3466120 | -4.6798690 | -0.9965850 |
| Au | 1.3925610 | -1.7963690 | -1.0016570 |
| Au | 1.3027330 | -6.1257550 | -3.4915860 |

|    |            |            |            |
|----|------------|------------|------------|
| Au | 1.3487420  | -3.2421840 | -3.4966180 |
| Au | 1.3946340  | -0.3586120 | -3.5017300 |
| Au | 1.3048050  | -4.6880680 | -5.9915370 |
| Au | 1.3507570  | -1.8044260 | -5.9966090 |
| Au | 1.3068780  | -3.2503120 | -8.4916100 |
| Au | -0.9777930 | -3.1992120 | -0.1469230 |
| Au | -1.0216720 | -4.6450970 | -2.6419240 |
| Au | -0.9757210 | -1.7614550 | -2.6469960 |
| Au | -1.0196000 | -3.2073410 | -5.1419970 |
| Au | 7.1448663  | -3.4010408 | -4.3028854 |
| C  | 6.9500859  | -5.8202070 | -6.1038333 |
| C  | 6.6960858  | -6.1580610 | -7.4841709 |
| C  | 6.7280943  | -4.9441703 | -8.2226452 |
| C  | 6.9788359  | -3.8821734 | -7.2842863 |
| N  | 7.0871431  | -4.4586299 | -6.0411354 |
| C  | 7.1634544  | -5.2093760 | -1.8734431 |
| C  | 7.1844820  | -6.6273813 | -1.5218501 |
| C  | 7.1668022  | -7.3585859 | -2.7271068 |
| C  | 7.1213961  | -6.3911968 | -3.8205969 |
| N  | 7.1565291  | -5.1401507 | -3.2496202 |
| C  | 7.1195360  | -0.9767601 | -2.4973574 |
| C  | 6.9264174  | -0.6287956 | -1.1094956 |
| C  | 6.9047592  | -1.8445084 | -0.3749669 |
| C  | 7.0838646  | -2.9156822 | -1.3198343 |
| N  | 7.1892522  | -2.3437932 | -2.5646023 |
| C  | 7.1679513  | -1.5935136 | -6.7339752 |
| C  | 7.2307648  | -0.1770135 | -7.0866186 |
| C  | 7.2701980  | 0.5542241  | -5.8814785 |
| C  | 7.2261955  | -0.4115988 | -4.7857326 |
| N  | 7.1883344  | -1.6630449 | -5.3578607 |
| N  | 7.0711379  | -2.5898445 | -7.5589360 |

|   |           |            |             |
|---|-----------|------------|-------------|
| N | 7.0200426 | -6.6646999 | -5.0862456  |
| N | 7.1239574 | -4.2105210 | -1.0465597  |
| N | 7.1910028 | -0.1361636 | -3.5175042  |
| C | 6.6469428 | -1.8443764 | 1.0098673   |
| C | 7.3212637 | 1.9518002  | -5.8875593  |
| C | 7.2378951 | 0.4733709  | -8.3248127  |
| C | 6.4408311 | -4.9342819 | -9.6019177  |
| C | 6.4145088 | -7.3834937 | -8.1205575  |
| C | 7.1736989 | -8.7567560 | -2.7224646  |
| C | 7.2069854 | -7.2784016 | -0.2842173  |
| C | 6.7326514 | 0.6069783  | -0.4634528  |
| C | 6.4894926 | 0.6029279  | 0.9084779   |
| H | 6.3319804 | 1.5520985  | 1.4361227   |
| C | 6.4352920 | -0.6110406 | 1.6388900   |
| C | 7.3324540 | 2.6019114  | -7.1264226  |
| C | 7.2905058 | 1.8714190  | -8.3305501  |
| H | 7.2985407 | 2.4098538  | -9.2869248  |
| C | 6.1446032 | -6.1568143 | -10.2217630 |
| C | 6.1437294 | -7.3698562 | -9.4875757  |
| H | 5.9211640 | -8.3100059 | -10.0077549 |
| C | 7.2162918 | -8.6772261 | -0.2798647  |
| H | 7.2360409 | -9.2164406 | 0.6758821   |
| C | 7.2007348 | -9.4078072 | -1.4845472  |
| H | 6.7704656 | 1.5418790  | -1.0370880  |
| H | 6.6570241 | -2.7849900 | 1.5758436   |
| H | 7.3532040 | 2.5102069  | -4.9433073  |
| H | 7.2026746 | -0.1065241 | -9.2558949  |
| H | 6.5045633 | -3.9994995 | -10.1741567 |
| H | 6.4176346 | -8.3180513 | -7.5447892  |
| H | 7.3736616 | 3.6980637  | -7.1632875  |
| H | 6.2576951 | -0.5783148 | 2.7220057   |

H 5.9517624 -6.1836045 -11.3025213

**Au<sub>26</sub>-AuPc (TPSS-D3)**

Au 3.7148940 -4.7147830 0.6487530  
Au 3.7608460 -1.8311410 0.6436810  
Au 3.6710750 -6.1605980 -1.8462070  
Au 3.7169670 -3.2770260 -1.8513200  
Au 3.7629750 -0.3934560 -1.8563520  
Au 3.6271390 -7.6064830 -4.3411260  
Au 3.6730900 -4.7228400 -4.3461980  
Au 3.7190390 -1.8393400 -4.3512700  
Au 3.7649900 1.0443020 -4.3563420  
Au 3.6292110 -6.1687260 -6.8411990  
Au 3.6752190 -3.2851550 -6.8462310  
Au 3.7211110 -0.4015830 -6.8513430  
Au 3.6313400 -4.7310410 -9.3412310  
Au 3.6772910 -1.8473980 -9.3463040  
Au 1.3466120 -4.6798690 -0.9965850  
Au 1.3925610 -1.7963690 -1.0016570  
Au 1.3027330 -6.1257550 -3.4915860  
Au 1.3487420 -3.2421840 -3.4966180  
Au 1.3946340 -0.3586120 -3.5017300  
Au 1.3048050 -4.6880680 -5.9915370  
Au 1.3507570 -1.8044260 -5.9966090  
Au 1.3068780 -3.2503120 -8.4916100  
Au -0.9777930 -3.1992120 -0.1469230  
Au -1.0216720 -4.6450970 -2.6419240  
Au -0.9757210 -1.7614550 -2.6469960  
Au -1.0196000 -3.2073410 -5.1419970  
Au 6.8856820 -3.3931638 -4.2736811  
C 6.7559894 -5.7905466 -6.1094026

|   |           |            |            |
|---|-----------|------------|------------|
| C | 6.5634010 | -6.1177734 | -7.5023208 |
| C | 6.6037694 | -4.8950039 | -8.2269309 |
| C | 6.7812898 | -3.8388983 | -7.2688529 |
| N | 6.8660301 | -4.4285151 | -6.0273796 |
| C | 6.8233728 | -5.2286320 | -1.8654269 |
| C | 6.6961810 | -6.6463367 | -1.5359688 |
| C | 6.7274919 | -7.3644440 | -2.7503070 |
| C | 6.8276703 | -6.3865566 | -3.8284228 |
| N | 6.8965952 | -5.1454739 | -3.2405384 |
| C | 6.9007448 | -0.9921811 | -2.4365944 |
| C | 6.7508251 | -0.6575687 | -1.0402089 |
| C | 6.7275751 | -1.8822245 | -0.3192985 |
| C | 6.8511722 | -2.9438077 | -1.2795891 |
| N | 6.9494843 | -2.3582407 | -2.5212401 |
| C | 6.8528764 | -1.5543755 | -6.6831528 |
| C | 6.7707172 | -0.1334981 | -7.0103005 |
| C | 6.8278022 | 0.5821852  | -5.7948353 |
| C | 6.9210801 | -0.3986765 | -4.7177590 |
| N | 6.9254387 | -1.6419338 | -5.3084184 |
| N | 6.8022534 | -2.5393384 | -7.5242664 |
| N | 6.7725346 | -6.6468290 | -5.0998005 |
| N | 6.8167181 | -4.2426088 | -1.0239613 |
| N | 6.9252329 | -0.1374570 | -3.4468471 |
| C | 6.4577705 | -1.8980779 | 1.0648252  |
| C | 6.7003652 | 1.9748746  | -5.7693871 |
| C | 6.5821135 | 0.5293153  | -8.2291045 |
| C | 6.3301966 | -4.8693394 | -9.6093173 |
| C | 6.2942592 | -7.3385226 | -8.1530036 |
| C | 6.5668346 | -8.7529625 | -2.7722820 |
| C | 6.5043568 | -7.3020993 | -0.3141565 |
| C | 6.5584270 | 0.5730672  | -0.3837067 |

|   |           |            |             |
|---|-----------|------------|-------------|
| C | 6.3114871 | 0.5557750  | 0.9875038   |
| H | 6.1474295 | 1.4986330  | 1.5234364   |
| C | 6.2490573 | -0.6663105 | 1.7054442   |
| C | 6.5114196 | 2.6367102  | -6.9886582  |
| C | 6.4519887 | 1.9230660  | -8.2021742  |
| H | 6.2934003 | 2.4696349  | -9.1403370  |
| C | 6.0478454 | -6.0901090 | -10.2452433 |
| C | 6.0429882 | -7.3114795 | -9.5239703  |
| H | 5.8229010 | -8.2450953 | -10.0560577 |
| C | 6.3418559 | -8.6917567 | -0.3375690  |
| H | 6.1806978 | -9.2340084 | 0.6027792   |
| C | 6.3740412 | -9.4081566 | -1.5508210  |
| H | 6.5890141 | 1.5101911  | -0.9536757  |
| H | 6.4681858 | -2.8453454 | 1.6198598   |
| H | 6.7445410 | 2.5170013  | -4.8159524  |
| H | 6.5239528 | -0.0414754 | -9.1647318  |
| H | 6.3993100 | -3.9270320 | -10.1687283 |
| H | 6.2821272 | -8.2749523 | -7.5807545  |
| H | 6.4013938 | 3.7283862  | -7.0011571  |
| H | 6.0647215 | -0.6444555 | 2.7873821   |
| H | 5.8663080 | -6.1055897 | -11.3279630 |

### **Au<sub>26</sub>-H<sub>2</sub>Pc (PBE)**

|    |           |            |            |
|----|-----------|------------|------------|
| Au | 3.7148940 | -4.7147830 | 0.6487530  |
| Au | 3.7608460 | -1.8311410 | 0.6436810  |
| Au | 3.6710750 | -6.1605980 | -1.8462070 |
| Au | 3.7169670 | -3.2770260 | -1.8513200 |
| Au | 3.7629750 | -0.3934560 | -1.8563520 |
| Au | 3.6271390 | -7.6064830 | -4.3411260 |
| Au | 3.6730900 | -4.7228400 | -4.3461980 |
| Au | 3.7190390 | -1.8393400 | -4.3512700 |

|    |            |            |            |
|----|------------|------------|------------|
| Au | 3.7649900  | 1.0443020  | -4.3563420 |
| Au | 3.6292110  | -6.1687260 | -6.8411990 |
| Au | 3.6752190  | -3.2851550 | -6.8462310 |
| Au | 3.7211110  | -0.4015830 | -6.8513430 |
| Au | 3.6313400  | -4.7310410 | -9.3412310 |
| Au | 3.6772910  | -1.8473980 | -9.3463040 |
| Au | 1.3466120  | -4.6798690 | -0.9965850 |
| Au | 1.3925610  | -1.7963690 | -1.0016570 |
| Au | 1.3027330  | -6.1257550 | -3.4915860 |
| Au | 1.3487420  | -3.2421840 | -3.4966180 |
| Au | 1.3946340  | -0.3586120 | -3.5017300 |
| Au | 1.3048050  | -4.6880680 | -5.9915370 |
| Au | 1.3507570  | -1.8044260 | -5.9966090 |
| Au | 1.3068780  | -3.2503120 | -8.4916100 |
| Au | -0.9777930 | -3.1992120 | -0.1469230 |
| Au | -1.0216720 | -4.6450970 | -2.6419240 |
| Au | -0.9757210 | -1.7614550 | -2.6469960 |
| Au | -1.0196000 | -3.2073410 | -5.1419970 |
| N  | 7.3413594  | -2.0432519 | -5.8250922 |
| N  | 7.3990241  | -2.0785400 | -2.9707049 |
| N  | 7.3064196  | -0.1523093 | -4.3744169 |
| N  | 7.2783562  | -3.5076906 | -7.7064284 |
| N  | 7.3946043  | -3.4847498 | -1.0425195 |
| N  | 7.2697132  | -4.9132190 | -5.7781258 |
| N  | 7.3210507  | -4.9486182 | -2.9232371 |
| N  | 7.1306355  | -6.8334011 | -4.3693653 |
| C  | 7.2790257  | -0.0315757 | -6.8503054 |
| C  | 7.2548923  | -0.0354051 | -1.9149829 |
| C  | 7.2918327  | -1.0369788 | -7.8463323 |
| C  | 7.3015563  | -1.0312129 | -0.9207398 |
| C  | 7.3159874  | -0.7014082 | -5.5566421 |



|   |           |            |            |
|---|-----------|------------|------------|
| C | 7.3267889 | -0.7507956 | -3.1973048 |
| C | 7.3168830 | -2.3230389 | -7.1654444 |
| C | 7.3809568 | -2.3082668 | -1.6411558 |
| C | 7.0543060 | -5.9531838 | -7.8225765 |
| C | 7.2965002 | -5.9534936 | -0.9008785 |
| C | 6.9803041 | -6.9450289 | -6.8250371 |
| C | 7.2027744 | -6.9563331 | -1.8950033 |
| C | 7.2235755 | -4.6823213 | -7.1071564 |
| C | 7.3574770 | -4.6691495 | -1.5834959 |
| C | 7.1353390 | -6.2350138 | -5.5468646 |
| C | 7.2191035 | -6.2871541 | -3.1891345 |
| C | 7.2238666 | 1.3233885  | -7.1988900 |
| C | 7.1489779 | 1.3152020  | -1.5765842 |
| C | 7.2471756 | -0.7045149 | -9.2050804 |
| C | 7.2432556 | -0.7014024 | 0.4344421  |
| C | 7.1827854 | 1.6511331  | -8.5558084 |
| C | 7.0918210 | 1.6493337  | -0.2169991 |
| C | 7.1950112 | 0.6484789  | -9.5479890 |
| C | 7.1393602 | 0.6538987  | 0.7760962  |
| C | 6.9413246 | -6.2810113 | -9.1751270 |
| C | 7.2903517 | -6.2853411 | 0.4586035  |
| C | 6.7920007 | -8.2885940 | -7.1579935 |
| C | 7.1043801 | -8.3078079 | -1.5443137 |
| C | 6.7552380 | -7.6288740 | -9.5106959 |
| C | 7.1923713 | -7.6349452 | 0.8037784  |
| C | 6.6802818 | -8.6198487 | -8.5146818 |
| C | 7.1004079 | -8.6349534 | -0.1868751 |
| H | 7.3295465 | -2.7671615 | -5.0900248 |
| H | 7.2160729 | 2.0972355  | -6.4131658 |
| H | 7.1147649 | 2.0858037  | -2.3650698 |
| H | 7.2585983 | -1.4992975 | -9.9694959 |

|   |           |            |             |
|---|-----------|------------|-------------|
| H | 7.2878273 | -1.4920573 | 1.2023251   |
| H | 7.1398980 | 2.7103142  | -8.8590944  |
| H | 7.0100691 | 2.7077710  | 0.0812001   |
| H | 7.1618800 | 0.9400233  | -10.6108201 |
| H | 7.0956823 | 0.9467217  | 1.8383327   |
| H | 7.0077955 | -5.4946333 | -9.9459324  |
| H | 7.3651411 | -5.4929606 | 1.2219124   |
| H | 6.7398996 | -9.0564371 | -6.3676690  |
| H | 7.0325531 | -9.0796447 | -2.3285880  |
| H | 6.6664598 | -7.9196015 | -10.5706345 |
| H | 7.1863173 | -7.9261162 | 1.8671245   |
| H | 6.5336603 | -9.6725714 | -8.8082556  |

#### **Au<sub>26</sub>-H<sub>2</sub>Pc (PBE-D3)**

|    |           |            |            |
|----|-----------|------------|------------|
| Au | 3.7148940 | -4.7147830 | 0.6487530  |
| Au | 3.7608460 | -1.8311410 | 0.6436810  |
| Au | 3.6710750 | -6.1605980 | -1.8462070 |
| Au | 3.7169670 | -3.2770260 | -1.8513200 |
| Au | 3.7629750 | -0.3934560 | -1.8563520 |
| Au | 3.6271390 | -7.6064830 | -4.3411260 |
| Au | 3.6730900 | -4.7228400 | -4.3461980 |
| Au | 3.7190390 | -1.8393400 | -4.3512700 |
| Au | 3.7649900 | 1.0443020  | -4.3563420 |
| Au | 3.6292110 | -6.1687260 | -6.8411990 |
| Au | 3.6752190 | -3.2851550 | -6.8462310 |
| Au | 3.7211110 | -0.4015830 | -6.8513430 |
| Au | 3.6313400 | -4.7310410 | -9.3412310 |
| Au | 3.6772910 | -1.8473980 | -9.3463040 |
| Au | 1.3466120 | -4.6798690 | -0.9965850 |
| Au | 1.3925610 | -1.7963690 | -1.0016570 |
| Au | 1.3027330 | -6.1257550 | -3.4915860 |

|    |            |            |            |
|----|------------|------------|------------|
| Au | 1.3487420  | -3.2421840 | -3.4966180 |
| Au | 1.3946340  | -0.3586120 | -3.5017300 |
| Au | 1.3048050  | -4.6880680 | -5.9915370 |
| Au | 1.3507570  | -1.8044260 | -5.9966090 |
| Au | 1.3068780  | -3.2503120 | -8.4916100 |
| Au | -0.9777930 | -3.1992120 | -0.1469230 |
| Au | -1.0216720 | -4.6450970 | -2.6419240 |
| Au | -0.9757210 | -1.7614550 | -2.6469960 |
| Au | -1.0196000 | -3.2073410 | -5.1419970 |
| N  | 7.0811717  | -2.0178481 | -5.8253492 |
| N  | 7.1353709  | -2.0435987 | -2.9848496 |
| N  | 6.9271893  | -0.1243088 | -4.3862632 |
| N  | 7.0646479  | -3.4898029 | -7.7049622 |
| N  | 7.1351008  | -3.4518790 | -1.0552399 |
| N  | 7.0379509  | -4.8960201 | -5.7754479 |
| N  | 7.0646513  | -4.9232084 | -2.9321486 |
| N  | 6.7855373  | -6.8050697 | -4.3677218 |
| C  | 6.8541875  | -0.0235511 | -6.8628192 |
| C  | 6.8607295  | -0.0159460 | -1.9249316 |
| C  | 6.9460888  | -1.0320117 | -7.8525979 |
| C  | 6.9709553  | -1.0103985 | -0.9325344 |
| C  | 6.9659424  | -0.6790531 | -5.5651848 |
| C  | 6.9898215  | -0.7215998 | -3.2098040 |
| C  | 7.0647148  | -2.3051704 | -7.1645870 |
| C  | 7.1160961  | -2.2774766 | -1.6549742 |
| C  | 6.7853002  | -5.9208064 | -7.8232829 |
| C  | 6.9270038  | -5.9050366 | -0.9024519 |
| C  | 6.6370009  | -6.9072483 | -6.8265635 |
| C  | 6.7844436  | -6.9088085 | -1.8913148 |
| C  | 7.0055692  | -4.6621398 | -7.1053478 |
| C  | 7.0816819  | -4.6359188 | -1.5931016 |

|   |           |            |             |
|---|-----------|------------|-------------|
| C | 6.8355595 | -6.2090587 | -5.5452885  |
| C | 6.8881102 | -6.2551298 | -3.1900753  |
| C | 6.6411809 | 1.3144832  | -7.2219392  |
| C | 6.6219299 | 1.3179197  | -1.5811231  |
| C | 6.8182854 | -0.7251794 | -9.2121422  |
| C | 6.8426489 | -0.6997597 | 0.4225415   |
| C | 6.5229465 | 1.6186398  | -8.5808820  |
| C | 6.4960212 | 1.6335979  | -0.2209572  |
| C | 6.6107978 | 0.6114920  | -9.5644282  |
| C | 6.6064160 | 0.6387184  | 0.7680273   |
| C | 6.6233541 | -6.2277914 | -9.1757778  |
| C | 6.8180597 | -6.2119842 | 0.4587614   |
| C | 6.3237306 | -8.2277396 | -7.1640834  |
| C | 6.5364946 | -8.2392967 | -1.5315147  |
| C | 6.3160750 | -7.5532630 | -9.5144818  |
| C | 6.5722213 | -7.5411326 | 0.8121533   |
| C | 6.1651464 | -8.5388947 | -8.5217337  |
| C | 6.4319311 | -8.5421245 | -0.1719745  |
| H | 7.0975963 | -2.7343788 | -5.0828334  |
| H | 6.5686342 | 2.0914905  | -6.4426594  |
| H | 6.5296883 | 2.0863662  | -2.3670392  |
| H | 6.8905697 | -1.5262640 | -9.9665973  |
| H | 6.9334805 | -1.4931161 | 1.1838778   |
| H | 6.3521847 | 2.6626145  | -8.8909130  |
| H | 6.3017633 | 2.6763872  | 0.0795941   |
| H | 6.5074083 | 0.8838550  | -10.6276529 |
| H | 6.4993456 | 0.9163498  | 1.8296547   |
| H | 6.7445434 | -5.4428931 | -9.9414455  |
| H | 6.9250261 | -5.4159696 | 1.2145803   |
| H | 6.2045331 | -8.9905637 | -6.3759968  |
| H | 6.4162269 | -9.0093808 | -2.3114606  |

|   |           |            |             |
|---|-----------|------------|-------------|
| H | 6.1844882 | -7.8276541 | -10.5741292 |
| H | 6.4781742 | -7.8126220 | 1.8765794   |

**Au<sub>26</sub>-H<sub>2</sub>Pc (TPSS)**

|    |            |            |            |
|----|------------|------------|------------|
| Au | 3.7148940  | -4.7147830 | 0.6487530  |
| Au | 3.7608460  | -1.8311410 | 0.6436810  |
| Au | 3.6710750  | -6.1605980 | -1.8462070 |
| Au | 3.7169670  | -3.2770260 | -1.8513200 |
| Au | 3.7629750  | -0.3934560 | -1.8563520 |
| Au | 3.6271390  | -7.6064830 | -4.3411260 |
| Au | 3.6730900  | -4.7228400 | -4.3461980 |
| Au | 3.7190390  | -1.8393400 | -4.3512700 |
| Au | 3.7649900  | 1.0443020  | -4.3563420 |
| Au | 3.6292110  | -6.1687260 | -6.8411990 |
| Au | 3.6752190  | -3.2851550 | -6.8462310 |
| Au | 3.7211110  | -0.4015830 | -6.8513430 |
| Au | 3.6313400  | -4.7310410 | -9.3412310 |
| Au | 3.6772910  | -1.8473980 | -9.3463040 |
| Au | 1.3466120  | -4.6798690 | -0.9965850 |
| Au | 1.3925610  | -1.7963690 | -1.0016570 |
| Au | 1.3027330  | -6.1257550 | -3.4915860 |
| Au | 1.3487420  | -3.2421840 | -3.4966180 |
| Au | 1.3946340  | -0.3586120 | -3.5017300 |
| Au | 1.3048050  | -4.6880680 | -5.9915370 |
| Au | 1.3507570  | -1.8044260 | -5.9966090 |
| Au | 1.3068780  | -3.2503120 | -8.4916100 |
| Au | -0.9777930 | -3.1992120 | -0.1469230 |
| Au | -1.0216720 | -4.6450970 | -2.6419240 |
| Au | -0.9757210 | -1.7614550 | -2.6469960 |
| Au | -1.0196000 | -3.2073410 | -5.1419970 |
| N  | 7.2356328  | -2.0297008 | -5.8234638 |

|   |           |            |            |
|---|-----------|------------|------------|
| N | 7.3042208 | -2.0632012 | -2.9708796 |
| N | 7.2195086 | -0.1341715 | -4.3731808 |
| N | 7.1858457 | -3.4907422 | -7.7116316 |
| N | 7.3305626 | -3.4684787 | -1.0407119 |
| N | 7.1504025 | -4.8933833 | -5.7801668 |
| N | 7.2178726 | -4.9271870 | -2.9266478 |
| N | 7.0152030 | -6.8157020 | -4.3714589 |
| C | 7.2278744 | -0.0159437 | -6.8482122 |
| C | 7.1788022 | -0.0184159 | -1.9128939 |
| C | 7.2411160 | -1.0207039 | -7.8448437 |
| C | 7.2361275 | -1.0143334 | -0.9189957 |
| C | 7.2299885 | -0.6868912 | -5.5551272 |
| C | 7.2351927 | -0.7344479 | -3.1952946 |
| C | 7.2299561 | -2.3071679 | -7.1655045 |
| C | 7.3025457 | -2.2910237 | -1.6401677 |
| C | 6.9437462 | -5.9354959 | -7.8258251 |
| C | 7.2597150 | -5.9381018 | -0.9065778 |
| C | 6.8546897 | -6.9257035 | -6.8270158 |
| C | 7.1468957 | -6.9393321 | -1.9005819 |
| C | 7.1138951 | -4.6653992 | -7.1106826 |
| C | 7.2870066 | -4.6518538 | -1.5866313 |
| C | 7.0101206 | -6.2150627 | -5.5495469 |
| C | 7.1212941 | -6.2668223 | -3.1923084 |
| C | 7.2145514 | 1.3415717  | -7.1958478 |
| C | 7.0910695 | 1.3346332  | -1.5740424 |
| C | 7.2384582 | -0.6863758 | -9.2050159 |
| C | 7.2073556 | -0.6835115 | 0.4380238  |
| C | 7.2145051 | 1.6706155  | -8.5531941 |
| C | 7.0637475 | 1.6693639  | -0.2133705 |
| C | 7.2265496 | 0.6679836  | -9.5467182 |
| C | 7.1222252 | 0.6734182  | 0.7797744  |

|   |           |            |             |
|---|-----------|------------|-------------|
| C | 6.8488996 | -6.2660436 | -9.1805265  |
| C | 7.3078008 | -6.2742455 | 0.4521656   |
| C | 6.6680459 | -8.2711905 | -7.1596799  |
| C | 7.0822551 | -8.2946397 | -1.5516311  |
| C | 6.6632193 | -7.6147211 | -9.5148961  |
| C | 7.2435620 | -7.6265695 | 0.7952174   |
| C | 6.5720031 | -8.6039378 | -8.5173756  |
| C | 7.1316972 | -8.6254523 | -0.1958055  |
| H | 7.2024804 | -2.7525797 | -5.0918103  |
| H | 7.2078924 | 2.1134547  | -6.4155650  |
| H | 7.0497193 | 2.1038137  | -2.3561828  |
| H | 7.2529134 | -1.4744540 | -9.9685471  |
| H | 7.2613871 | -1.4675633 | 1.2044535   |
| H | 7.2066244 | 2.7256682  | -8.8555544  |
| H | 6.9990588 | 2.7237800  | 0.0851293   |
| H | 7.2272793 | 0.9601861  | -10.6046945 |
| H | 7.1036150 | 0.9664586  | 1.8375059   |
| H | 6.9331681 | -5.4887880 | -9.9512058  |
| H | 7.3984062 | -5.4893096 | 1.2136804   |
| H | 6.6078077 | -9.0367914 | -6.3750583  |
| H | 6.9974135 | -9.0638219 | -2.3298384  |
| H | 6.5900251 | -7.9075246 | -10.5702313 |
| H | 7.2812608 | -7.9204958 | 1.8520255   |
| H | 6.4281376 | -9.6521745 | -8.8097084  |

**Au<sub>26</sub>-H<sub>2</sub>Pc (TPSS-D3)**

|    |           |            |            |
|----|-----------|------------|------------|
| Au | 3.7148940 | -4.7147830 | 0.6487530  |
| Au | 3.7608460 | -1.8311410 | 0.6436810  |
| Au | 3.6710750 | -6.1605980 | -1.8462070 |
| Au | 3.7169670 | -3.2770260 | -1.8513200 |
| Au | 3.7629750 | -0.3934560 | -1.8563520 |

|    |            |            |            |
|----|------------|------------|------------|
| Au | 3.6271390  | -7.6064830 | -4.3411260 |
| Au | 3.6730900  | -4.7228400 | -4.3461980 |
| Au | 3.7190390  | -1.8393400 | -4.3512700 |
| Au | 3.7649900  | 1.0443020  | -4.3563420 |
| Au | 3.6292110  | -6.1687260 | -6.8411990 |
| Au | 3.6752190  | -3.2851550 | -6.8462310 |
| Au | 3.7211110  | -0.4015830 | -6.8513430 |
| Au | 3.6313400  | -4.7310410 | -9.3412310 |
| Au | 3.6772910  | -1.8473980 | -9.3463040 |
| Au | 1.3466120  | -4.6798690 | -0.9965850 |
| Au | 1.3925610  | -1.7963690 | -1.0016570 |
| Au | 1.3027330  | -6.1257550 | -3.4915860 |
| Au | 1.3487420  | -3.2421840 | -3.4966180 |
| Au | 1.3946340  | -0.3586120 | -3.5017300 |
| Au | 1.3048050  | -4.6880680 | -5.9915370 |
| Au | 1.3507570  | -1.8044260 | -5.9966090 |
| Au | 1.3068780  | -3.2503120 | -8.4916100 |
| Au | -0.9777930 | -3.1992120 | -0.1469230 |
| Au | -1.0216720 | -4.6450970 | -2.6419240 |
| Au | -0.9757210 | -1.7614550 | -2.6469960 |
| Au | -1.0196000 | -3.2073410 | -5.1419970 |
| N  | 6.9562209  | -1.5793131 | -5.1696079 |
| N  | 7.0178707  | -2.2874902 | -2.3922995 |
| N  | 6.9349938  | -0.0813553 | -3.3087214 |
| N  | 6.8570867  | -2.5336998 | -7.3563418 |
| N  | 6.8684894  | -4.1081737 | -0.8494817 |
| N  | 6.9177575  | -4.3597070 | -5.8116436 |
| N  | 6.9261345  | -5.0690759 | -3.0362687 |
| N  | 6.7650749  | -6.5612345 | -4.8954380 |
| C  | 6.8346812  | 0.6225389  | -5.6707132 |
| C  | 6.7074242  | -0.5524041 | -0.9063887 |



|   |           |            |             |
|---|-----------|------------|-------------|
| C | 6.7899578 | -0.1113549 | -6.8812061  |
| C | 6.7099189 | -1.7559638 | -0.1730202  |
| C | 6.9395222 | -0.3396782 | -4.5846215  |
| C | 6.9137810 | -0.9454238 | -2.3089700  |
| C | 6.8898913 | -1.5219302 | -6.5382185  |
| C | 6.8998505 | -2.8217010 | -1.1560052  |
| C | 6.6385372 | -4.8822370 | -8.0374347  |
| C | 6.7374210 | -6.5292324 | -1.3200766  |
| C | 6.5578929 | -6.0807284 | -7.2988757  |
| C | 6.7343068 | -7.2643247 | -2.5297189  |
| C | 6.8349663 | -3.8203355 | -7.0492745  |
| C | 6.8677992 | -5.1214287 | -1.6676848  |
| C | 6.7706276 | -5.6971953 | -5.8962999  |
| C | 6.8325227 | -6.3050725 | -3.6189477  |
| C | 6.6871517 | 2.0158446  | -5.6660997  |
| C | 6.4555575 | 0.6776373  | -0.2863072  |
| C | 6.5904674 | 0.5354241  | -8.1093650  |
| C | 6.3898959 | -1.7705135 | 1.1932708   |
| C | 6.4921454 | 2.6566793  | -6.8933765  |
| C | 6.1686119 | 0.6753397  | 1.0846178   |
| C | 6.4427268 | 1.9257248  | -8.0993676  |
| C | 6.1201030 | -0.5308626 | 1.8142160   |
| C | 6.3959918 | -4.8644507 | -9.4154199  |
| C | 6.5611300 | -7.1691812 | -0.0863216  |
| C | 6.2559730 | -7.3005518 | -7.9216244  |
| C | 6.5561061 | -8.6525230 | -2.5280921  |
| C | 6.0935112 | -6.0920280 | -10.0446526 |
| C | 6.3819857 | -8.5545986 | -0.0896349  |
| C | 6.0361122 | -7.2928408 | -9.3069148  |
| C | 6.3808364 | -9.2874662 | -1.2960529  |
| H | 6.9572347 | -2.4615386 | -4.6397437  |

|   |           |            |             |
|---|-----------|------------|-------------|
| H | 6.7240158 | 2.5725578  | -4.7207551  |
| H | 6.4681595 | 1.6053588  | -0.8725217  |
| H | 6.5419852 | -0.0476917 | -9.0379157  |
| H | 6.4177668 | -2.7092013 | 1.7626978   |
| H | 6.3681903 | 3.7466110  | -6.9214468  |
| H | 5.9591832 | 1.6212836  | 1.5990752   |
| H | 6.2774962 | 2.4588978  | -9.0440996  |
| H | 5.8984995 | -0.5021526 | 2.8889668   |
| H | 6.4870977 | -3.9290891 | -9.9833800  |
| H | 6.5507919 | -6.5839360 | 0.8418492   |
| H | 6.2105916 | -8.2266280 | -7.3338958  |
| H | 6.5437902 | -9.2094929 | -3.4736030  |
| H | 5.9415215 | -6.1203942 | -11.1318441 |
| H | 6.2322353 | -9.0839140 | 0.8598624   |
| H | 5.8006889 | -8.2302570 | -9.8256476  |

#### **Au<sub>58</sub>-AuPc (PBE)**

|    |            |            |            |
|----|------------|------------|------------|
| Au | -0.5558531 | -0.2116859 | -5.0905861 |
| N  | -2.1981274 | 0.9806187  | -5.1747236 |
| C  | -2.1579467 | 2.3496089  | -5.1976167 |
| C  | -3.4914260 | 0.5157078  | -5.1734302 |
| C  | -3.5317724 | 2.8198248  | -5.2337545 |
| C  | -4.3631960 | 1.6760752  | -5.2187772 |
| N  | 1.0882753  | -1.4040197 | -5.0580674 |
| C  | 1.0481307  | -2.7737979 | -5.0093220 |
| C  | 2.4235981  | -3.2412652 | -4.9833308 |
| C  | 3.2524548  | -2.0956243 | -5.0100393 |
| N  | 0.6355464  | 1.4329125  | -5.1263693 |
| C  | 2.0095232  | 1.3925494  | -5.0922595 |
| C  | 0.1710884  | 2.7228405  | -5.1567497 |
| C  | 2.4777413  | 2.7697090  | -5.1018949 |

|   |            |            |            |
|---|------------|------------|------------|
| C | 1.3335885  | 3.5978356  | -5.1414841 |
| N | -1.7469750 | -1.8570190 | -5.0943417 |
| C | -3.1199128 | -1.8131938 | -5.0793200 |
| C | -1.2818572 | -3.1444479 | -5.0081561 |
| C | -3.5885260 | -3.1849266 | -4.9711106 |
| C | -2.4448663 | -4.0135599 | -4.9246182 |
| N | -0.0295955 | -3.5173650 | -4.9873180 |
| N | 2.7481484  | 0.3176566  | -5.0618157 |
| N | -1.0802507 | 3.0943489  | -5.1918246 |
| N | -3.8601420 | -0.7384081 | -5.1288003 |
| C | -5.4669673 | 4.2273961  | -5.2925028 |
| H | -5.9264600 | 5.2290037  | -5.3176055 |
| C | -6.2968128 | 3.0874509  | -5.2787324 |
| H | -7.3915114 | 3.2168118  | -5.2947379 |
| C | 5.1914984  | -3.4975902 | -4.9152709 |
| H | 6.2867860  | -3.6207491 | -4.8831344 |
| C | -4.9916055 | -5.1124070 | -4.7261485 |
| H | -5.9924015 | -5.5686102 | -4.6482225 |
| C | -3.8501561 | -5.9388821 | -4.6770761 |
| H | -3.9760024 | -7.0279263 | -4.5603455 |
| C | 2.7379869  | 5.5364544  | -5.1276646 |
| H | 2.8633619  | 6.6317338  | -5.1339003 |
| C | 3.8789105  | 4.7103315  | -5.0905745 |
| H | 4.8798171  | 5.1716778  | -5.0646287 |
| C | -5.7569031 | 1.7992627  | -5.2398773 |
| C | -4.0752355 | 4.1081571  | -5.2683589 |
| C | -2.5628648 | -5.3999793 | -4.7735329 |
| C | -4.8753003 | -3.7260911 | -4.8714655 |
| C | 1.4508074  | 4.9908717  | -5.1539441 |
| C | 3.7637824  | 3.3173143  | -5.0753596 |
| C | 2.9722931  | -4.5272630 | -4.9308970 |

|    |            |            |            |
|----|------------|------------|------------|
| C  | 4.6465300  | -2.2122249 | -4.9721519 |
| H  | 2.3169545  | -5.4138085 | -4.9168525 |
| H  | -1.6629525 | -6.0366691 | -4.7382478 |
| H  | -5.7607340 | -3.0695434 | -4.9074284 |
| H  | -6.3972305 | 0.9018967  | -5.2238394 |
| H  | -3.4157357 | 4.9916645  | -5.2713361 |
| H  | 0.5515690  | 5.6283407  | -5.1785143 |
| H  | 4.6508531  | 2.6634988  | -5.0380407 |
| H  | 5.2842106  | -1.3128867 | -4.9865167 |
| C  | 4.3650904  | -4.6410050 | -4.8971063 |
| H  | 4.8276017  | -5.6410960 | -4.8573411 |
| C  | 2.3797825  | -0.9381285 | -5.0528767 |
| Au | 5.2595290  | 1.6764350  | -1.3620180 |
| Au | 2.7826380  | 3.1718680  | -1.3850780 |
| Au | 2.7068820  | 0.3013020  | -1.4063550 |
| Au | 0.2672940  | 1.8085160  | -1.4487060 |
| Au | -2.2096280 | 3.3040890  | -1.4716690 |
| Au | -2.2853300 | 0.4336060  | -1.4930470 |
| Au | 2.6492610  | -2.5815420 | -1.4218810 |
| Au | 0.1739110  | -1.0865610 | -1.4499360 |
| Au | 0.0965830  | -3.9565370 | -1.4662210 |
| Au | -2.3430580 | -2.4494080 | -1.5085710 |
| Au | -4.8198970 | -0.9538880 | -1.5315320 |
| Au | 0.3248850  | 4.6914960  | -1.4332830 |
| Au | -4.7485080 | 1.9418100  | -1.5759660 |
| Au | 5.1767570  | -1.2184500 | -1.3692300 |
| Au | 7.7070890  | 0.1357210  | -1.3040530 |
| Au | 5.3381540  | 4.4788680  | -1.4712660 |
| Au | 2.9115150  | 6.0066420  | -1.5139360 |
| Au | -2.1203050 | 6.2307180  | -1.4911920 |
| Au | -4.6572730 | 4.8448560  | -1.5296360 |

|    |            |            |            |
|----|------------|------------|------------|
| Au | -7.1930210 | 3.4806060  | -1.6338590 |
| Au | -4.9176690 | -3.7456530 | -1.4281100 |
| Au | -2.4724700 | -5.2850270 | -1.3796000 |
| Au | 2.5410960  | -5.4953330 | -1.4083280 |
| Au | 5.0937750  | -4.1203380 | -1.3639880 |
| Au | 7.6212700  | -2.7572460 | -1.3113370 |
| Au | -7.3621820 | -2.2068580 | -1.4860030 |
| Au | -7.2644100 | 0.5849070  | -1.5894250 |
| Au | 0.4670870  | 7.5453840  | -1.5718270 |
| Au | 7.7826670  | 2.9400730  | -1.4133730 |
| Au | -0.0279570 | -6.8238220 | -1.3217070 |
| Au | -5.7202900 | -2.2102450 | 0.8725870  |
| Au | -3.2617370 | -3.7342480 | 0.9455020  |
| Au | -3.1510680 | -0.8656090 | 0.8736410  |
| Au | -0.7294540 | -2.4011700 | 0.9264340  |
| Au | 1.7290990  | -3.9251730 | 0.9993490  |
| Au | 1.8397150  | -1.0566180 | 0.9274890  |
| Au | -3.0585890 | 2.0156320  | 0.8069260  |
| Au | -0.6000360 | 0.4916300  | 0.8798400  |
| Au | -0.4893670 | 3.3602690  | 0.8079790  |
| Au | 1.9322470  | 1.8247070  | 0.8607720  |
| Au | 4.3908000  | 0.3007040  | 0.9336870  |
| Au | -0.8219860 | -5.2824950 | 0.9931510  |
| Au | 4.2860090  | -2.5942790 | 0.9403620  |
| Au | -5.6027050 | 0.6828580  | 0.8146660  |
| Au | -4.9051860 | -0.7978090 | 3.1392560  |
| Au | -2.4647880 | -2.3513730 | 3.1980300  |
| Au | -2.3212280 | 0.5167320  | 3.2003290  |
| Au | 0.0823780  | -1.0474290 | 3.2383630  |
| Au | 2.5226890  | -2.6009380 | 3.2972350  |
| Au | 2.6662810  | 0.2670260  | 3.2994380  |

|    |            |            |           |
|----|------------|------------|-----------|
| Au | -2.1955830 | 3.3975000  | 3.2077760 |
| Au | 0.2447280  | 1.8439920  | 3.2666480 |
| Au | 0.3883740  | 4.7120410  | 3.2688500 |
| Au | 2.7919780  | 3.1478810  | 3.3069830 |
| Au | 5.2322910  | 1.5943710  | 3.3657550 |
| Au | -0.0432670 | -3.9282010 | 3.2308160 |

### **Au<sub>58</sub>-AuPc (PBE-D3)**

|    |            |            |            |
|----|------------|------------|------------|
| Au | 5.2595290  | 1.6764350  | -1.3620180 |
| Au | 2.7826380  | 3.1718680  | -1.3850780 |
| Au | 2.7068820  | 0.3013020  | -1.4063550 |
| Au | 0.2672940  | 1.8085160  | -1.4487060 |
| Au | -2.2096280 | 3.3040890  | -1.4716690 |
| Au | -2.2853300 | 0.4336060  | -1.4930470 |
| Au | 2.6492610  | -2.5815420 | -1.4218810 |
| Au | 0.1739110  | -1.0865610 | -1.4499360 |
| Au | 0.0965830  | -3.9565370 | -1.4662210 |
| Au | -2.3430580 | -2.4494080 | -1.5085710 |
| Au | -4.8198970 | -0.9538880 | -1.5315320 |
| Au | 0.3248850  | 4.6914960  | -1.4332830 |
| Au | -4.7485080 | 1.9418100  | -1.5759660 |
| Au | 5.1767570  | -1.2184500 | -1.3692300 |
| Au | 7.7070890  | 0.1357210  | -1.3040530 |
| Au | 5.3381540  | 4.4788680  | -1.4712660 |
| Au | 2.9115150  | 6.0066420  | -1.5139360 |
| Au | -2.1203050 | 6.2307180  | -1.4911920 |
| Au | -4.6572730 | 4.8448560  | -1.5296360 |
| Au | -7.1930210 | 3.4806060  | -1.6338590 |
| Au | -4.9176690 | -3.7456530 | -1.4281100 |
| Au | -2.4724700 | -5.2850270 | -1.3796000 |
| Au | 2.5410960  | -5.4953330 | -1.4083280 |

|    |            |            |            |
|----|------------|------------|------------|
| Au | 5.0937750  | -4.1203380 | -1.3639880 |
| Au | 7.6212700  | -2.7572460 | -1.3113370 |
| Au | -7.3621820 | -2.2068580 | -1.4860030 |
| Au | -7.2644100 | 0.5849070  | -1.5894250 |
| Au | 0.4670870  | 7.5453840  | -1.5718270 |
| Au | 7.7826670  | 2.9400730  | -1.4133730 |
| Au | -0.0279570 | -6.8238220 | -1.3217070 |
| Au | -5.7202900 | -2.2102450 | 0.8725870  |
| Au | -3.2617370 | -3.7342480 | 0.9455020  |
| Au | -3.1510680 | -0.8656090 | 0.8736410  |
| Au | -0.7294540 | -2.4011700 | 0.9264340  |
| Au | 1.7290990  | -3.9251730 | 0.9993490  |
| Au | 1.8397150  | -1.0566180 | 0.9274890  |
| Au | -3.0585890 | 2.0156320  | 0.8069260  |
| Au | -0.6000360 | 0.4916300  | 0.8798400  |
| Au | -0.4893670 | 3.3602690  | 0.8079790  |
| Au | 1.9322470  | 1.8247070  | 0.8607720  |
| Au | 4.3908000  | 0.3007040  | 0.9336870  |
| Au | -0.8219860 | -5.2824950 | 0.9931510  |
| Au | 4.2860090  | -2.5942790 | 0.9403620  |
| Au | -5.6027050 | 0.6828580  | 0.8146660  |
| Au | -4.9051860 | -0.7978090 | 3.1392560  |
| Au | -2.4647880 | -2.3513730 | 3.1980300  |
| Au | -2.3212280 | 0.5167320  | 3.2003290  |
| Au | 0.0823780  | -1.0474290 | 3.2383630  |
| Au | 2.5226890  | -2.6009380 | 3.2972350  |
| Au | 2.6662810  | 0.2670260  | 3.2994380  |
| Au | -2.1955830 | 3.3975000  | 3.2077760  |
| Au | 0.2447280  | 1.8439920  | 3.2666480  |
| Au | 0.3883740  | 4.7120410  | 3.2688500  |
| Au | 2.7919780  | 3.1478810  | 3.3069830  |

|    |            |            |            |
|----|------------|------------|------------|
| Au | 5.2322910  | 1.5943710  | 3.3657550  |
| Au | -0.0432670 | -3.9282010 | 3.2308160  |
| Au | 5.0949050  | -1.2984980 | 3.2978380  |
| Au | -4.7545370 | 2.0943060  | 3.1561060  |
| Au | -0.5502326 | 0.1318521  | -4.6966060 |
| C  | 2.2350261  | -1.0515344 | -4.6902677 |
| C  | 3.6308982  | -0.6426126 | -4.6368672 |
| C  | 3.6541456  | 0.7702459  | -4.6372691 |
| C  | 2.2710271  | 1.2242169  | -4.6890979 |
| N  | 1.4810651  | 0.0984819  | -4.7060740 |
| C  | -1.7317434 | -2.6513726 | -4.7288759 |
| C  | -1.3318681 | -4.0418320 | -4.6870888 |
| C  | 0.0868276  | -4.0681623 | -4.6742656 |
| C  | 0.5389311  | -2.6903889 | -4.7048515 |
| N  | -0.5800979 | -1.9006945 | -4.7378272 |
| C  | -3.3355752 | 1.3149073  | -4.8054857 |
| C  | -4.7343847 | 0.9084584  | -4.8349054 |
| C  | -4.7588881 | -0.5050099 | -4.8367090 |
| C  | -3.3736577 | -0.9586753 | -4.7958108 |
| N  | -2.5826375 | 0.1660063  | -4.7763499 |
| C  | 0.6313548  | 2.9177862  | -4.7152743 |
| C  | 0.2267333  | 4.3098114  | -4.7387980 |
| C  | -1.1917828 | 4.3316867  | -4.7558974 |
| C  | -1.6396870 | 2.9541058  | -4.7425002 |
| N  | -0.5145842 | 2.1637592  | -4.7224893 |
| N  | 1.8620283  | 2.4598506  | -4.7034242 |
| N  | 1.7852668  | -2.2737556 | -4.6896235 |
| N  | -2.9620651 | -2.1930211 | -4.7759759 |
| N  | -2.8832797 | 2.5356020  | -4.7876305 |
| C  | -5.9663072 | -1.2072669 | -4.8628792 |
| C  | -1.8936849 | 5.5414424  | -4.8028447 |



|   |            |            |            |
|---|------------|------------|------------|
| C | 0.9663988  | 5.4976774  | -4.7745751 |
| C | 4.8596999  | 1.4762274  | -4.5584556 |
| C | 4.8124573  | -1.3836592 | -4.5286764 |
| C | 0.7826629  | -5.2835357 | -4.6411720 |
| C | -2.0770990 | -5.2271736 | -4.6502378 |
| C | -5.9188805 | 1.6497367  | -4.8253143 |
| C | -7.1292037 | 0.9442151  | -4.8380243 |
| H | -8.0799339 | 1.5028913  | -4.8321414 |
| C | -7.1519806 | -0.4647578 | -4.8688964 |
| C | -1.1504671 | 6.7241494  | -4.8468016 |
| C | 0.2606235  | 6.7024306  | -4.8338658 |
| H | 0.8165482  | 7.6537451  | -4.8708194 |
| C | 6.0425703  | 0.7342718  | -4.4686506 |
| C | 6.0188050  | -0.6763359 | -4.4433933 |
| H | 6.9677744  | -1.2309010 | -4.3525288 |
| C | -1.3768881 | -6.4365593 | -4.6153583 |
| H | -1.9353436 | -7.3867180 | -4.5915219 |
| C | 0.0355479  | -6.4643131 | -4.6135196 |
| H | -5.8900159 | 2.7516551  | -4.7999283 |
| H | -5.9688368 | -2.3098796 | -4.8639133 |
| H | -2.9962172 | 5.5441282  | -4.8093974 |
| H | 2.0685117  | 5.4692511  | -4.7540696 |
| H | 4.8635487  | 2.5795739  | -4.5597105 |
| H | 4.7831716  | -2.4861527 | -4.5097935 |
| H | -1.6743821 | 7.6930720  | -4.8881869 |
| H | -8.1216348 | -0.9892603 | -4.8850887 |
| H | 7.0093677  | 1.2598747  | -4.3970844 |
| H | 1.8853161  | -5.2923926 | -4.6311508 |

**Au<sub>58</sub>-AuPc (TPSS)**

|    |           |           |            |
|----|-----------|-----------|------------|
| Au | 5.2595290 | 1.6764350 | -1.3620180 |
|----|-----------|-----------|------------|

|    |            |            |            |
|----|------------|------------|------------|
| Au | 2.7826380  | 3.1718680  | -1.3850780 |
| Au | 2.7068820  | 0.3013020  | -1.4063550 |
| Au | 0.2672940  | 1.8085160  | -1.4487060 |
| Au | -2.2096280 | 3.3040890  | -1.4716690 |
| Au | -2.2853300 | 0.4336060  | -1.4930470 |
| Au | 2.6492610  | -2.5815420 | -1.4218810 |
| Au | 0.1739110  | -1.0865610 | -1.4499360 |
| Au | 0.0965830  | -3.9565370 | -1.4662210 |
| Au | -2.3430580 | -2.4494080 | -1.5085710 |
| Au | -4.8198970 | -0.9538880 | -1.5315320 |
| Au | 0.3248850  | 4.6914960  | -1.4332830 |
| Au | -4.7485080 | 1.9418100  | -1.5759660 |
| Au | 5.1767570  | -1.2184500 | -1.3692300 |
| Au | 7.7070890  | 0.1357210  | -1.3040530 |
| Au | 5.3381540  | 4.4788680  | -1.4712660 |
| Au | 2.9115150  | 6.0066420  | -1.5139360 |
| Au | -2.1203050 | 6.2307180  | -1.4911920 |
| Au | -4.6572730 | 4.8448560  | -1.5296360 |
| Au | -7.1930210 | 3.4806060  | -1.6338590 |
| Au | -4.9176690 | -3.7456530 | -1.4281100 |
| Au | -2.4724700 | -5.2850270 | -1.3796000 |
| Au | 2.5410960  | -5.4953330 | -1.4083280 |
| Au | 5.0937750  | -4.1203380 | -1.3639880 |
| Au | 7.6212700  | -2.7572460 | -1.3113370 |
| Au | -7.3621820 | -2.2068580 | -1.4860030 |
| Au | -7.2644100 | 0.5849070  | -1.5894250 |
| Au | 0.4670870  | 7.5453840  | -1.5718270 |
| Au | 7.7826670  | 2.9400730  | -1.4133730 |
| Au | -0.0279570 | -6.8238220 | -1.3217070 |
| Au | -5.7202900 | -2.2102450 | 0.8725870  |
| Au | -3.2617370 | -3.7342480 | 0.9455020  |

|    |            |            |            |
|----|------------|------------|------------|
| Au | -3.1510680 | -0.8656090 | 0.8736410  |
| Au | -0.7294540 | -2.4011700 | 0.9264340  |
| Au | 1.7290990  | -3.9251730 | 0.9993490  |
| Au | 1.8397150  | -1.0566180 | 0.9274890  |
| Au | -3.0585890 | 2.0156320  | 0.8069260  |
| Au | -0.6000360 | 0.4916300  | 0.8798400  |
| Au | -0.4893670 | 3.3602690  | 0.8079790  |
| Au | 1.9322470  | 1.8247070  | 0.8607720  |
| Au | 4.3908000  | 0.3007040  | 0.9336870  |
| Au | -0.8219860 | -5.2824950 | 0.9931510  |
| Au | 4.2860090  | -2.5942790 | 0.9403620  |
| Au | -5.6027050 | 0.6828580  | 0.8146660  |
| Au | -4.9051860 | -0.7978090 | 3.1392560  |
| Au | -2.4647880 | -2.3513730 | 3.1980300  |
| Au | -2.3212280 | 0.5167320  | 3.2003290  |
| Au | 0.0823780  | -1.0474290 | 3.2383630  |
| Au | 2.5226890  | -2.6009380 | 3.2972350  |
| Au | 2.6662810  | 0.2670260  | 3.2994380  |
| Au | -2.1955830 | 3.3975000  | 3.2077760  |
| Au | 0.2447280  | 1.8439920  | 3.2666480  |
| Au | 0.3883740  | 4.7120410  | 3.2688500  |
| Au | 2.7919780  | 3.1478810  | 3.3069830  |
| Au | 5.2322910  | 1.5943710  | 3.3657550  |
| Au | -0.0432670 | -3.9282010 | 3.2308160  |
| Au | 5.0949050  | -1.2984980 | 3.2978380  |
| Au | -4.7545370 | 2.0943060  | 3.1561060  |
| Au | 0.1110942  | -0.1263538 | -4.9212584 |
| C  | 2.6399430  | -1.7883769 | -4.9662102 |
| C  | 4.0878580  | -1.6384758 | -4.9896374 |
| C  | 4.3627860  | -0.2536922 | -4.9871123 |
| C  | 3.0826026  | 0.4388539  | -4.9694418 |

|   |            |            |            |
|---|------------|------------|------------|
| N | 2.1026449  | -0.5221008 | -4.9546124 |
| C | -1.5492682 | -2.6522087 | -4.9322521 |
| C | -1.4035444 | -4.0942179 | -4.8783011 |
| C | -0.0152608 | -4.3729652 | -4.8846649 |
| C | 0.6750377  | -3.0977566 | -4.9320754 |
| N | -0.2865936 | -2.1180576 | -4.9508175 |
| C | -2.4169533 | 1.5359632  | -5.0000425 |
| C | -3.8642212 | 1.3862966  | -5.0399351 |
| C | -4.1397557 | 0.0012731  | -5.0549043 |
| C | -2.8606355 | -0.6911583 | -5.0036623 |
| N | -1.8804865 | 0.2698813  | -4.9735798 |
| C | 1.7723968  | 2.4018655  | -4.9637429 |
| C | 1.6263118  | 3.8451668  | -4.9916680 |
| C | 0.2380467  | 4.1231852  | -4.9924822 |
| C | -0.4523653 | 2.8471327  | -4.9685625 |
| N | 0.5105929  | 1.8654501  | -4.9504360 |
| N | 2.9009258  | 1.7318559  | -4.9789880 |
| N | 1.9733017  | -2.9100999 | -4.9580888 |
| N | -2.6788428 | -1.9836602 | -4.9806106 |
| N | -1.7497129 | 2.6570687  | -4.9951443 |
| C | -5.4544752 | -0.4742382 | -5.0981149 |
| C | -0.2333835 | 5.4414155  | -5.0441113 |
| C | 2.5706251  | 4.8779924  | -5.0399112 |
| C | 5.6774838  | 0.2238958  | -4.9862052 |
| C | 5.1229399  | -2.5794750 | -5.0000603 |
| C | 0.4542342  | -5.6930893 | -4.8554007 |
| C | -2.3487434 | -5.1271700 | -4.8233698 |
| C | -4.8986417 | 2.3291292  | -5.0517522 |
| C | -6.2132054 | 1.8513677  | -5.0974511 |
| H | -7.0462297 | 2.5655756  | -5.1102660 |
| C | -6.4873960 | 0.4690684  | -5.1245460 |

|   |            |            |            |
|---|------------|------------|------------|
| C | 0.7122002  | 6.4684596  | -5.0976791 |
| C | 2.0960491  | 6.1910657  | -5.0941438 |
| H | 2.8099530  | 7.0232818  | -5.1367610 |
| C | 6.7110419  | -0.7182168 | -4.9931053 |
| C | 6.4370523  | -2.1009548 | -5.0031042 |
| H | 7.2721697  | -2.8127564 | -5.0059433 |
| C | -1.8752201 | -6.4420095 | -4.7848536 |
| H | -2.5899250 | -7.2740392 | -4.7478142 |
| C | -0.4907249 | -6.7211233 | -4.8061523 |
| H | -4.6775483 | 3.4037983  | -5.0306114 |
| H | -5.6590914 | -1.5521149 | -5.1115553 |
| H | -1.3104256 | 5.6497626  | -5.0458593 |
| H | 3.6445483  | 4.6531271  | -5.0382994 |
| H | 5.8813694  | 1.3018511  | -4.9758275 |
| H | 4.9010420  | -3.6537480 | -5.0016025 |
| H | 0.3746463  | 7.5115696  | -5.1432886 |
| H | -7.5301147 | 0.1288013  | -5.1658206 |
| H | 7.7540393  | -0.3776284 | -4.9865427 |
| H | 1.5313994  | -5.9012276 | -4.8713409 |

### **Au<sub>58</sub>-AuPc (TPSS-D3)**

|    |            |            |            |
|----|------------|------------|------------|
| Au | 5.2595290  | 1.6764350  | -1.3620180 |
| Au | 2.7826380  | 3.1718680  | -1.3850780 |
| Au | 2.7068820  | 0.3013020  | -1.4063550 |
| Au | 0.2672940  | 1.8085160  | -1.4487060 |
| Au | -2.2096280 | 3.3040890  | -1.4716690 |
| Au | -2.2853300 | 0.4336060  | -1.4930470 |
| Au | 2.6492610  | -2.5815420 | -1.4218810 |
| Au | 0.1739110  | -1.0865610 | -1.4499360 |
| Au | 0.0965830  | -3.9565370 | -1.4662210 |
| Au | -2.3430580 | -2.4494080 | -1.5085710 |

|    |            |            |            |
|----|------------|------------|------------|
| Au | -4.8198970 | -0.9538880 | -1.5315320 |
| Au | 0.3248850  | 4.6914960  | -1.4332830 |
| Au | -4.7485080 | 1.9418100  | -1.5759660 |
| Au | 5.1767570  | -1.2184500 | -1.3692300 |
| Au | 7.7070890  | 0.1357210  | -1.3040530 |
| Au | 5.3381540  | 4.4788680  | -1.4712660 |
| Au | 2.9115150  | 6.0066420  | -1.5139360 |
| Au | -2.1203050 | 6.2307180  | -1.4911920 |
| Au | -4.6572730 | 4.8448560  | -1.5296360 |
| Au | -7.1930210 | 3.4806060  | -1.6338590 |
| Au | -4.9176690 | -3.7456530 | -1.4281100 |
| Au | -2.4724700 | -5.2850270 | -1.3796000 |
| Au | 2.5410960  | -5.4953330 | -1.4083280 |
| Au | 5.0937750  | -4.1203380 | -1.3639880 |
| Au | 7.6212700  | -2.7572460 | -1.3113370 |
| Au | -7.3621820 | -2.2068580 | -1.4860030 |
| Au | -7.2644100 | 0.5849070  | -1.5894250 |
| Au | 0.4670870  | 7.5453840  | -1.5718270 |
| Au | 7.7826670  | 2.9400730  | -1.4133730 |
| Au | -0.0279570 | -6.8238220 | -1.3217070 |
| Au | -5.7202900 | -2.2102450 | 0.8725870  |
| Au | -3.2617370 | -3.7342480 | 0.9455020  |
| Au | -3.1510680 | -0.8656090 | 0.8736410  |
| Au | -0.7294540 | -2.4011700 | 0.9264340  |
| Au | 1.7290990  | -3.9251730 | 0.9993490  |
| Au | 1.8397150  | -1.0566180 | 0.9274890  |
| Au | -3.0585890 | 2.0156320  | 0.8069260  |
| Au | -0.6000360 | 0.4916300  | 0.8798400  |
| Au | -0.4893670 | 3.3602690  | 0.8079790  |
| Au | 1.9322470  | 1.8247070  | 0.8607720  |
| Au | 4.3908000  | 0.3007040  | 0.9336870  |

|    |            |            |            |
|----|------------|------------|------------|
| Au | -0.8219860 | -5.2824950 | 0.9931510  |
| Au | 4.2860090  | -2.5942790 | 0.9403620  |
| Au | -5.6027050 | 0.6828580  | 0.8146660  |
| Au | -4.9051860 | -0.7978090 | 3.1392560  |
| Au | -2.4647880 | -2.3513730 | 3.1980300  |
| Au | -2.3212280 | 0.5167320  | 3.2003290  |
| Au | 0.0823780  | -1.0474290 | 3.2383630  |
| Au | 2.5226890  | -2.6009380 | 3.2972350  |
| Au | 2.6662810  | 0.2670260  | 3.2994380  |
| Au | -2.1955830 | 3.3975000  | 3.2077760  |
| Au | 0.2447280  | 1.8439920  | 3.2666480  |
| Au | 0.3883740  | 4.7120410  | 3.2688500  |
| Au | 2.7919780  | 3.1478810  | 3.3069830  |
| Au | 5.2322910  | 1.5943710  | 3.3657550  |
| Au | -0.0432670 | -3.9282010 | 3.2308160  |
| Au | 5.0949050  | -1.2984980 | 3.2978380  |
| Au | -4.7545370 | 2.0943060  | 3.1561060  |
| Au | 0.1906369  | 0.2064020  | -4.5232471 |
| C  | 1.5933479  | -2.4807715 | -4.5035559 |
| C  | 2.9290980  | -3.0471049 | -4.4724188 |
| C  | 3.8446342  | -1.9615187 | -4.4835285 |
| C  | 3.0600268  | -0.7441423 | -4.5242828 |
| N  | 1.7389535  | -1.1122135 | -4.5552366 |
| C  | -2.4880378 | -1.1986452 | -4.6233929 |
| C  | -3.0638390 | -2.5283442 | -4.5664286 |
| C  | -1.9855990 | -3.4492050 | -4.5095776 |
| C  | -0.7579357 | -2.6732070 | -4.5426429 |
| N  | -1.1220693 | -1.3484164 | -4.6126320 |
| C  | -1.2106978 | 2.8927137  | -4.5630880 |
| C  | -2.5470512 | 3.4609250  | -4.5865799 |
| C  | -3.4625313 | 2.3770030  | -4.6192494 |

|   |            |            |            |
|---|------------|------------|------------|
| C | -2.6790287 | 1.1565609  | -4.6123705 |
| N | -1.3548699 | 1.5260113  | -4.6044868 |
| C | 2.8708041  | 1.6119032  | -4.5477195 |
| C | 3.4470731  | 2.9443627  | -4.5708747 |
| C | 2.3693909  | 3.8655516  | -4.5790411 |
| C | 1.1416951  | 3.0885815  | -4.5561772 |
| N | 1.5049238  | 1.7614785  | -4.5592123 |
| N | 3.5286278  | 0.4825464  | -4.5119937 |
| N | 0.4622980  | -3.1460285 | -4.5015549 |
| N | -3.1478581 | -0.0686979 | -4.6199983 |
| N | -0.0794399 | 3.5583211  | -4.5454220 |
| C | -4.8452706 | 2.5971081  | -4.6701766 |
| C | 2.6010089  | 5.2448695  | -4.6169599 |
| C | 4.7747525  | 3.3819726  | -4.5954434 |
| C | 5.2282005  | -2.1792485 | -4.4501614 |
| C | 3.3829209  | -4.3726578 | -4.4555407 |
| C | -2.2166459 | -4.8275502 | -4.4041121 |
| C | -4.3937325 | -2.9681147 | -4.5236840 |
| C | -2.9985877 | 4.7860777  | -4.6105495 |
| C | -4.3805312 | 5.0023063  | -4.6606258 |
| H | -4.7648284 | 6.0297358  | -4.6859798 |
| C | -5.2908348 | 3.9223470  | -4.6973024 |
| C | 3.9318088  | 5.6803405  | -4.6570822 |
| C | 5.0035423  | 4.7626459  | -4.6420326 |
| H | 6.0345151  | 5.1378380  | -4.6700838 |
| C | 5.6767433  | -3.5040743 | -4.4145369 |
| C | 4.7659097  | -4.5871972 | -4.4171636 |
| H | 5.1530900  | -5.6141832 | -4.4076152 |
| C | -4.6231548 | -4.3455426 | -4.4193055 |
| H | -5.6540851 | -4.7233088 | -4.4010678 |
| C | -3.5479176 | -5.2638307 | -4.3596109 |



|   |            |            |            |
|---|------------|------------|------------|
| H | -2.2831281 | 5.6172789  | -4.5871170 |
| H | -5.5456458 | 1.7519530  | -4.6964964 |
| H | 1.7605301  | 5.9505012  | -4.6196013 |
| H | 5.6015440  | 2.6606667  | -4.5714139 |
| H | 5.9294252  | -1.3344618 | -4.4558540 |
| H | 2.6672637  | -5.2042528 | -4.4750016 |
| H | 4.1468747  | 6.7556078  | -4.6936368 |
| H | -6.3675212 | 4.1288088  | -4.7385625 |
| H | 6.7548921  | -3.7071557 | -4.3908172 |
| H | -1.3742269 | -5.5309314 | -4.3688814 |

### **Au<sub>58</sub>-H<sub>2</sub>Pc (PBE)**

|    |            |            |            |
|----|------------|------------|------------|
| Au | 5.2595290  | 1.6764350  | -1.3620180 |
| Au | 2.7826380  | 3.1718680  | -1.3850780 |
| Au | 2.7068820  | 0.3013020  | -1.4063550 |
| Au | 0.2672940  | 1.8085160  | -1.4487060 |
| Au | -2.2096280 | 3.3040890  | -1.4716690 |
| Au | -2.2853300 | 0.4336060  | -1.4930470 |
| Au | 2.6492610  | -2.5815420 | -1.4218810 |
| Au | 0.1739110  | -1.0865610 | -1.4499360 |
| Au | 0.0965830  | -3.9565370 | -1.4662210 |
| Au | -2.3430580 | -2.4494080 | -1.5085710 |
| Au | -4.8198970 | -0.9538880 | -1.5315320 |
| Au | 0.3248850  | 4.6914960  | -1.4332830 |
| Au | -4.7485080 | 1.9418100  | -1.5759660 |
| Au | 5.1767570  | -1.2184500 | -1.3692300 |
| Au | 7.7070890  | 0.1357210  | -1.3040530 |
| Au | 5.3381540  | 4.4788680  | -1.4712660 |
| Au | 2.9115150  | 6.0066420  | -1.5139360 |
| Au | -2.1203050 | 6.2307180  | -1.4911920 |
| Au | -4.6572730 | 4.8448560  | -1.5296360 |

|    |            |            |            |
|----|------------|------------|------------|
| Au | -7.1930210 | 3.4806060  | -1.6338590 |
| Au | -4.9176690 | -3.7456530 | -1.4281100 |
| Au | -2.4724700 | -5.2850270 | -1.3796000 |
| Au | 2.5410960  | -5.4953330 | -1.4083280 |
| Au | 5.0937750  | -4.1203380 | -1.3639880 |
| Au | 7.6212700  | -2.7572460 | -1.3113370 |
| Au | -7.3621820 | -2.2068580 | -1.4860030 |
| Au | -7.2644100 | 0.5849070  | -1.5894250 |
| Au | 0.4670870  | 7.5453840  | -1.5718270 |
| Au | 7.7826670  | 2.9400730  | -1.4133730 |
| Au | -0.0279570 | -6.8238220 | -1.3217070 |
| Au | -5.7202900 | -2.2102450 | 0.8725870  |
| Au | -3.2617370 | -3.7342480 | 0.9455020  |
| Au | -3.1510680 | -0.8656090 | 0.8736410  |
| Au | -0.7294540 | -2.4011700 | 0.9264340  |
| Au | 1.7290990  | -3.9251730 | 0.9993490  |
| Au | 1.8397150  | -1.0566180 | 0.9274890  |
| Au | -3.0585890 | 2.0156320  | 0.8069260  |
| Au | -0.6000360 | 0.4916300  | 0.8798400  |
| Au | -0.4893670 | 3.3602690  | 0.8079790  |
| Au | 1.9322470  | 1.8247070  | 0.8607720  |
| Au | 4.3908000  | 0.3007040  | 0.9336870  |
| Au | -0.8219860 | -5.2824950 | 0.9931510  |
| Au | 4.2860090  | -2.5942790 | 0.9403620  |
| Au | -5.6027050 | 0.6828580  | 0.8146660  |
| Au | -4.9051860 | -0.7978090 | 3.1392560  |
| Au | -2.4647880 | -2.3513730 | 3.1980300  |
| Au | -2.3212280 | 0.5167320  | 3.2003290  |
| Au | 0.0823780  | -1.0474290 | 3.2383630  |
| Au | 2.5226890  | -2.6009380 | 3.2972350  |
| Au | 2.6662810  | 0.2670260  | 3.2994380  |

|    |            |            |            |
|----|------------|------------|------------|
| Au | -2.1955830 | 3.3975000  | 3.2077760  |
| Au | 0.2447280  | 1.8439920  | 3.2666480  |
| Au | 0.3883740  | 4.7120410  | 3.2688500  |
| Au | 2.7919780  | 3.1478810  | 3.3069830  |
| Au | 5.2322910  | 1.5943710  | 3.3657550  |
| Au | -0.0432670 | -3.9282010 | 3.2308160  |
| Au | 5.0949050  | -1.2984980 | 3.2978380  |
| Au | -4.7545370 | 2.0943060  | 3.1561060  |
| N  | -1.3310957 | 1.0787158  | -5.1099077 |
| N  | 1.5276822  | 1.2043939  | -5.0791893 |
| N  | 0.0125726  | 3.0474962  | -5.1059594 |
| N  | -3.1292103 | -0.4867964 | -5.0775084 |
| N  | 3.5337273  | -0.0854705 | -5.0452264 |
| N  | -1.1236053 | -1.7819010 | -5.0765510 |
| N  | 1.7364652  | -1.6531231 | -5.0665734 |
| N  | 0.3924255  | -3.6214440 | -4.9690625 |
| C  | -2.4657991 | 3.0329167  | -5.1452439 |
| C  | 2.4599383  | 3.3127294  | -5.0716437 |
| C  | -3.4066261 | 1.9738598  | -5.1409647 |
| C  | 3.5128863  | 2.3768520  | -5.0560692 |
| C  | -1.1377406 | 2.4335712  | -5.1208632 |
| C  | 1.2229141  | 2.5196488  | -5.0852391 |
| C  | -2.6558080 | 0.7263659  | -5.1135189 |
| C  | 2.8698172  | 1.0553675  | -5.0599009 |
| C  | -3.1055966 | -2.9394229 | -4.8865884 |
| C  | 3.8087056  | -2.5461144 | -4.9757411 |
| C  | -2.0538195 | -3.8771941 | -4.8491820 |
| C  | 2.8693131  | -3.6048116 | -4.9616863 |
| C  | -2.4629545 | -1.6260566 | -5.0297268 |
| C  | 3.0586831  | -1.2989902 | -5.0387197 |
| C  | -0.8182344 | -3.0926335 | -4.9759703 |

|   |            |            |            |
|---|------------|------------|------------|
| C | 1.5417850  | -3.0084983 | -5.0088391 |
| C | -2.8860086 | 4.3677412  | -5.1644675 |
| C | 2.7133970  | 4.6847300  | -5.0851556 |
| C | -4.7821546 | 2.2331973  | -5.1481772 |
| C | 4.8452743  | 2.7912391  | -5.0524875 |
| C | -4.2597580 | 4.6219265  | -5.1767675 |
| C | 4.0509251  | 5.1033622  | -5.0844198 |
| C | -5.1960843 | 3.5677278  | -5.1671033 |
| C | 5.1025518  | 4.1693864  | -5.0669671 |
| C | -4.4384368 | -3.3445016 | -4.7760223 |
| C | 5.1825725  | -2.8020703 | -4.9100383 |
| C | -2.3102719 | -5.2423560 | -4.6925963 |
| C | 3.2885802  | -4.9379218 | -4.8882372 |
| C | -4.6985973 | -4.7138599 | -4.6200970 |
| C | 5.5976036  | -4.1336859 | -4.8284109 |
| C | -3.6469541 | -5.6512276 | -4.5783898 |
| C | 4.6614727  | -5.1900144 | -4.8213066 |
| H | -0.5597872 | 0.3954893  | -5.0650603 |
| H | -2.1447273 | 5.1845091  | -5.1673490 |
| H | 1.8800911  | 5.4073389  | -5.0997379 |
| H | -5.5060764 | 1.4005760  | -5.1431116 |
| H | 5.6627259  | 2.0511207  | -5.0438352 |
| H | -4.6197785 | 5.6641990  | -5.1930189 |
| H | 4.2835306  | 6.1810972  | -5.0972568 |
| H | -6.2737779 | 3.8023690  | -5.1709101 |
| H | 6.1455665  | 4.5273207  | -5.0698000 |
| H | -5.2531506 | -2.6012336 | -4.8174704 |
| H | 5.9053444  | -1.9696649 | -4.9177744 |
| H | -1.4794105 | -5.9679281 | -4.6739532 |
| H | 2.5462389  | -5.7532599 | -4.8891565 |
| H | -5.7415174 | -5.0668669 | -4.5493555 |

H 6.6745680 -4.3638172 -4.7756665  
H -3.8818140 -6.7231734 -4.4681754

**Au<sub>58</sub>-H<sub>2</sub>Pc (PBE-D3)**

Au 5.2595290 1.6764350 -1.3620180  
Au 2.7826380 3.1718680 -1.3850780  
Au 2.7068820 0.3013020 -1.4063550  
Au 0.2672940 1.8085160 -1.4487060  
Au -2.2096280 3.3040890 -1.4716690  
Au -2.2853300 0.4336060 -1.4930470  
Au 2.6492610 -2.5815420 -1.4218810  
Au 0.1739110 -1.0865610 -1.4499360  
Au 0.0965830 -3.9565370 -1.4662210  
Au -2.3430580 -2.4494080 -1.5085710  
Au -4.8198970 -0.9538880 -1.5315320  
Au 0.3248850 4.6914960 -1.4332830  
Au -4.7485080 1.9418100 -1.5759660  
Au 5.1767570 -1.2184500 -1.3692300  
Au 7.7070890 0.1357210 -1.3040530  
Au 5.3381540 4.4788680 -1.4712660  
Au 2.9115150 6.0066420 -1.5139360  
Au -2.1203050 6.2307180 -1.4911920  
Au -4.6572730 4.8448560 -1.5296360  
Au -7.1930210 3.4806060 -1.6338590  
Au -4.9176690 -3.7456530 -1.4281100  
Au -2.4724700 -5.2850270 -1.3796000  
Au 2.5410960 -5.4953330 -1.4083280  
Au 5.0937750 -4.1203380 -1.3639880  
Au 7.6212700 -2.7572460 -1.3113370  
Au -7.3621820 -2.2068580 -1.4860030  
Au -7.2644100 0.5849070 -1.5894250  
Au 0.4670870 7.5453840 -1.5718270

|    |            |            |            |
|----|------------|------------|------------|
| Au | 7.7826670  | 2.9400730  | -1.4133730 |
| Au | -0.0279570 | -6.8238220 | -1.3217070 |
| Au | -5.7202900 | -2.2102450 | 0.8725870  |
| Au | -3.2617370 | -3.7342480 | 0.9455020  |
| Au | -3.1510680 | -0.8656090 | 0.8736410  |
| Au | -0.7294540 | -2.4011700 | 0.9264340  |
| Au | 1.7290990  | -3.9251730 | 0.9993490  |
| Au | 1.8397150  | -1.0566180 | 0.9274890  |
| Au | -3.0585890 | 2.0156320  | 0.8069260  |
| Au | -0.6000360 | 0.4916300  | 0.8798400  |
| Au | -0.4893670 | 3.3602690  | 0.8079790  |
| Au | 1.9322470  | 1.8247070  | 0.8607720  |
| Au | 4.3908000  | 0.3007040  | 0.9336870  |
| Au | -0.8219860 | -5.2824950 | 0.9931510  |
| Au | 4.2860090  | -2.5942790 | 0.9403620  |
| Au | -5.6027050 | 0.6828580  | 0.8146660  |
| Au | -4.9051860 | -0.7978090 | 3.1392560  |
| Au | -2.4647880 | -2.3513730 | 3.1980300  |
| Au | -2.3212280 | 0.5167320  | 3.2003290  |
| Au | 0.0823780  | -1.0474290 | 3.2383630  |
| Au | 2.5226890  | -2.6009380 | 3.2972350  |
| Au | 2.6662810  | 0.2670260  | 3.2994380  |
| Au | -2.1955830 | 3.3975000  | 3.2077760  |
| Au | 0.2447280  | 1.8439920  | 3.2666480  |
| Au | 0.3883740  | 4.7120410  | 3.2688500  |
| Au | 2.7919780  | 3.1478810  | 3.3069830  |
| Au | 5.2322910  | 1.5943710  | 3.3657550  |
| Au | -0.0432670 | -3.9282010 | 3.2308160  |
| Au | 5.0949050  | -1.2984980 | 3.2978380  |
| Au | -4.7545370 | 2.0943060  | 3.1561060  |
| N  | -1.2485199 | 1.6283759  | -4.7407574 |

|   |            |            |            |
|---|------------|------------|------------|
| N | 1.5969820  | 1.6132324  | -4.6497524 |
| N | 0.1833657  | 3.5348797  | -4.6896121 |
| N | -3.1223978 | 0.1510438  | -4.7725758 |
| N | 3.5331637  | 0.2174021  | -4.6261045 |
| N | -1.1856688 | -1.2464646 | -4.7602601 |
| N | 1.6613615  | -1.2622655 | -4.6981608 |
| N | 0.2282319  | -3.1685118 | -4.6786729 |
| C | -2.2904940 | 3.6348843  | -4.7603495 |
| C | 2.6422858  | 3.6673103  | -4.6866666 |
| C | -3.2806103 | 2.6202259  | -4.7904517 |
| C | 3.6440725  | 2.6740623  | -4.6577965 |
| C | -0.9928593 | 2.9740561  | -4.7230499 |
| C | 1.3640716  | 2.9441219  | -4.6722176 |
| C | -2.5884852 | 1.3390214  | -4.7707815 |
| C | 2.9302609  | 1.3905271  | -4.6395380 |
| C | -3.2306598 | -2.3017710 | -4.6770441 |
| C | 3.6917523  | -2.2514117 | -4.6238541 |
| C | -2.2295413 | -3.2972225 | -4.6425490 |
| C | 2.7029063  | -3.2677539 | -4.6530210 |
| C | -2.5168412 | -1.0214129 | -4.7515842 |
| C | 2.9988827  | -0.9709674 | -4.6503085 |
| C | -0.9515045 | -2.5754249 | -4.6988006 |
| C | 1.4053951  | -2.6089209 | -4.6857590 |
| C | -2.6449813 | 4.9875091  | -4.7784501 |
| C | 2.9707342  | 5.0220391  | -4.7438535 |
| C | -4.6409151 | 2.9419660  | -4.8321225 |
| C | 4.9973276  | 3.0118959  | -4.6740177 |
| C | -4.0054701 | 5.3046655  | -4.8223109 |
| C | 4.3305639  | 5.3642023  | -4.7670744 |
| C | -4.9907806 | 4.2952711  | -4.8465579 |
| C | 5.3298092  | 4.3741031  | -4.7253671 |

|   |            |            |            |
|---|------------|------------|------------|
| C | -4.5847633 | -2.6373632 | -4.6180082 |
| C | 5.0529686  | -2.5706535 | -4.5706684 |
| C | -2.5599589 | -4.6522290 | -4.5594852 |
| C | 3.0604828  | -4.6205564 | -4.6386508 |
| C | -4.9191781 | -3.9973305 | -4.5216181 |
| C | 5.4058281  | -3.9237829 | -4.5465107 |
| C | -3.9197675 | -4.9920777 | -4.5021336 |
| C | 4.4214171  | -4.9364062 | -4.5864111 |
| H | -0.5094524 | 0.9115493  | -4.6776390 |
| H | -1.8642856 | 5.7658914  | -4.7510961 |
| H | 2.1773036  | 5.7873446  | -4.7723905 |
| H | -5.4030674 | 2.1447859  | -4.8491600 |
| H | 5.7727655  | 2.2282969  | -4.6439485 |
| H | -4.3150688 | 6.3624148  | -4.8338088 |
| H | 4.6230300  | 6.4260655  | -4.8114238 |
| H | -6.0560629 | 4.5784443  | -4.8723941 |
| H | 6.3913736  | 4.6721638  | -4.7410890 |
| H | -5.3579235 | -1.8503872 | -4.6419821 |
| H | 5.8139306  | -1.7725721 | -4.5423134 |
| H | -1.7669459 | -5.4192942 | -4.5504247 |
| H | 2.2802712  | -5.3994526 | -4.6699121 |
| H | -5.9812756 | -4.2944108 | -4.4902252 |
| H | 6.4716102  | -4.2043463 | -4.505786  |

#### **Au<sub>58</sub>-H<sub>2</sub>Pc (TPSS)**

|    |            |           |            |
|----|------------|-----------|------------|
| Au | 5.2595290  | 1.6764350 | -1.3620180 |
| Au | 2.7826380  | 3.1718680 | -1.3850780 |
| Au | 2.7068820  | 0.3013020 | -1.4063550 |
| Au | 0.2672940  | 1.8085160 | -1.4487060 |
| Au | -2.2096280 | 3.3040890 | -1.4716690 |
| Au | -2.2853300 | 0.4336060 | -1.4930470 |



|    |            |            |            |
|----|------------|------------|------------|
| Au | 2.6492610  | -2.5815420 | -1.4218810 |
| Au | 0.1739110  | -1.0865610 | -1.4499360 |
| Au | 0.0965830  | -3.9565370 | -1.4662210 |
| Au | -2.3430580 | -2.4494080 | -1.5085710 |
| Au | -4.8198970 | -0.9538880 | -1.5315320 |
| Au | 0.3248850  | 4.6914960  | -1.4332830 |
| Au | -4.7485080 | 1.9418100  | -1.5759660 |
| Au | 5.1767570  | -1.2184500 | -1.3692300 |
| Au | 7.7070890  | 0.1357210  | -1.3040530 |
| Au | 5.3381540  | 4.4788680  | -1.4712660 |
| Au | 2.9115150  | 6.0066420  | -1.5139360 |
| Au | -2.1203050 | 6.2307180  | -1.4911920 |
| Au | -4.6572730 | 4.8448560  | -1.5296360 |
| Au | -7.1930210 | 3.4806060  | -1.6338590 |
| Au | -4.9176690 | -3.7456530 | -1.4281100 |
| Au | -2.4724700 | -5.2850270 | -1.3796000 |
| Au | 2.5410960  | -5.4953330 | -1.4083280 |
| Au | 5.0937750  | -4.1203380 | -1.3639880 |
| Au | 7.6212700  | -2.7572460 | -1.3113370 |
| Au | -7.3621820 | -2.2068580 | -1.4860030 |
| Au | -7.2644100 | 0.5849070  | -1.5894250 |
| Au | 0.4670870  | 7.5453840  | -1.5718270 |
| Au | 7.7826670  | 2.9400730  | -1.4133730 |
| Au | -0.0279570 | -6.8238220 | -1.3217070 |
| Au | -5.7202900 | -2.2102450 | 0.8725870  |
| Au | -3.2617370 | -3.7342480 | 0.9455020  |
| Au | -3.1510680 | -0.8656090 | 0.8736410  |
| Au | -0.7294540 | -2.4011700 | 0.9264340  |
| Au | 1.7290990  | -3.9251730 | 0.9993490  |
| Au | 1.8397150  | -1.0566180 | 0.9274890  |
| Au | -3.0585890 | 2.0156320  | 0.8069260  |

|    |            |            |            |
|----|------------|------------|------------|
| Au | -0.6000360 | 0.4916300  | 0.8798400  |
| Au | -0.4893670 | 3.3602690  | 0.8079790  |
| Au | 1.9322470  | 1.8247070  | 0.8607720  |
| Au | 4.3908000  | 0.3007040  | 0.9336870  |
| Au | -0.8219860 | -5.2824950 | 0.9931510  |
| Au | 4.2860090  | -2.5942790 | 0.9403620  |
| Au | -5.6027050 | 0.6828580  | 0.8146660  |
| Au | -4.9051860 | -0.7978090 | 3.1392560  |
| Au | -2.4647880 | -2.3513730 | 3.1980300  |
| Au | -2.3212280 | 0.5167320  | 3.2003290  |
| Au | 0.0823780  | -1.0474290 | 3.2383630  |
| Au | 2.5226890  | -2.6009380 | 3.2972350  |
| Au | 2.6662810  | 0.2670260  | 3.2994380  |
| Au | -2.1955830 | 3.3975000  | 3.2077760  |
| Au | 0.2447280  | 1.8439920  | 3.2666480  |
| Au | 0.3883740  | 4.7120410  | 3.2688500  |
| Au | 2.7919780  | 3.1478810  | 3.3069830  |
| Au | 5.2322910  | 1.5943710  | 3.3657550  |
| Au | -0.0432670 | -3.9282010 | 3.2308160  |
| Au | 5.0949050  | -1.2984980 | 3.2978380  |
| Au | -4.7545370 | 2.0943060  | 3.1561060  |
| N  | -1.2459589 | 1.6031126  | -4.9814071 |
| N  | 1.6141639  | 1.5927079  | -4.9185150 |
| N  | 0.1925161  | 3.5091590  | -4.9639961 |
| N  | -3.1253844 | 0.1310559  | -4.9830638 |
| N  | 3.5563473  | 0.2056188  | -4.8964097 |
| N  | -1.1834378 | -1.2579650 | -4.9425509 |
| N  | 1.6779152  | -1.2688470 | -4.9084625 |
| N  | 0.2391779  | -3.1739505 | -4.8455068 |
| C  | -2.2811310 | 3.6119875  | -5.0388716 |
| C  | 2.6510279  | 3.6531439  | -4.9316198 |

|   |            |            |            |
|---|------------|------------|------------|
| C | -3.2733019 | 2.6018682  | -5.0529276 |
| C | 3.6564658  | 2.6657874  | -4.9102341 |
| C | -0.9853890 | 2.9482184  | -4.9889976 |
| C | 1.3768784  | 2.9223457  | -4.9341381 |
| C | -2.5875016 | 1.3186268  | -5.0084764 |
| C | 2.9485550  | 1.3788764  | -4.9044116 |
| C | -3.2233106 | -2.3236319 | -4.8250510 |
| C | 3.7052910  | -2.2655804 | -4.8548472 |
| C | -2.2178065 | -3.3116806 | -4.7829017 |
| C | 2.7136050  | -3.2767427 | -4.8451842 |
| C | -2.5158394 | -1.0409204 | -4.9275786 |
| C | 3.0177804  | -0.9828833 | -4.8914410 |
| C | -0.9443794 | -2.5844660 | -4.8594110 |
| C | 1.4176379  | -2.6141686 | -4.8699979 |
| C | -2.6321061 | 4.9668431  | -5.0814532 |
| C | 2.9726186  | 5.0115913  | -4.9709767 |
| C | -4.6338858 | 2.9287630  | -5.1039492 |
| C | 5.0093255  | 3.0122040  | -4.9223080 |
| C | -3.9906223 | 5.2887013  | -5.1338524 |
| C | 4.3301902  | 5.3619589  | -4.9870898 |
| C | -4.9794400 | 4.2820280  | -5.1426562 |
| C | 5.3345498  | 4.3760118  | -4.9594768 |
| C | -4.5768634 | -2.6683155 | -4.7720520 |
| C | 5.0673905  | -2.5911318 | -4.8283397 |
| C | -2.5405134 | -4.6697841 | -4.6968496 |
| C | 3.0670503  | -4.6320727 | -4.8191040 |
| C | -4.9035844 | -4.0296475 | -4.6752046 |
| C | 5.4157727  | -3.9441631 | -4.7940895 |
| C | -3.8980112 | -5.0179888 | -4.6441217 |
| C | 4.4270854  | -4.9531185 | -4.7941348 |
| H | -0.5148445 | 0.8818410  | -4.9239853 |

|   |            |            |            |
|---|------------|------------|------------|
| H | -1.8558239 | 5.7422554  | -5.0769290 |
| H | 2.1820775  | 5.7724392  | -4.9981114 |
| H | -5.3959280 | 2.1393215  | -5.1169553 |
| H | 5.7871144  | 2.2378705  | -4.9097958 |
| H | -4.2960801 | 6.3421592  | -5.1702893 |
| H | 4.6164084  | 6.4210618  | -5.0251938 |
| H | -6.0380190 | 4.5687922  | -5.1826404 |
| H | 6.3892855  | 4.6801773  | -4.9772165 |
| H | -5.3539103 | -1.8941629 | -4.8143951 |
| H | 5.8291590  | -1.8012441 | -4.8387135 |
| H | -1.7503104 | -5.4320555 | -4.6912989 |
| H | 2.2906508  | -5.4077305 | -4.8288351 |
| H | -5.9588284 | -4.3336049 | -4.6547607 |
| H | 6.4757609  | -4.2292871 | -4.7790007 |
| H | -4.1859424 | -6.0760988 | -4.5927864 |

### **Au<sub>58</sub>-H<sub>2</sub>Pc (TPSS-D3)**

|    |            |            |            |
|----|------------|------------|------------|
| Au | 5.2595290  | 1.6764350  | -1.3620180 |
| Au | 2.7826380  | 3.1718680  | -1.3850780 |
| Au | 2.7068820  | 0.3013020  | -1.4063550 |
| Au | 0.2672940  | 1.8085160  | -1.4487060 |
| Au | -2.2096280 | 3.3040890  | -1.4716690 |
| Au | -2.2853300 | 0.4336060  | -1.4930470 |
| Au | 2.6492610  | -2.5815420 | -1.4218810 |
| Au | 0.1739110  | -1.0865610 | -1.4499360 |
| Au | 0.0965830  | -3.9565370 | -1.4662210 |
| Au | -2.3430580 | -2.4494080 | -1.5085710 |
| Au | -4.8198970 | -0.9538880 | -1.5315320 |
| Au | 0.3248850  | 4.6914960  | -1.4332830 |
| Au | -4.7485080 | 1.9418100  | -1.5759660 |
| Au | 5.1767570  | -1.2184500 | -1.3692300 |

|    |            |            |            |
|----|------------|------------|------------|
| Au | 7.7070890  | 0.1357210  | -1.3040530 |
| Au | 5.3381540  | 4.4788680  | -1.4712660 |
| Au | 2.9115150  | 6.0066420  | -1.5139360 |
| Au | -2.1203050 | 6.2307180  | -1.4911920 |
| Au | -4.6572730 | 4.8448560  | -1.5296360 |
| Au | -7.1930210 | 3.4806060  | -1.6338590 |
| Au | -4.9176690 | -3.7456530 | -1.4281100 |
| Au | -2.4724700 | -5.2850270 | -1.3796000 |
| Au | 2.5410960  | -5.4953330 | -1.4083280 |
| Au | 5.0937750  | -4.1203380 | -1.3639880 |
| Au | 7.6212700  | -2.7572460 | -1.3113370 |
| Au | -7.3621820 | -2.2068580 | -1.4860030 |
| Au | -7.2644100 | 0.5849070  | -1.5894250 |
| Au | 0.4670870  | 7.5453840  | -1.5718270 |
| Au | 7.7826670  | 2.9400730  | -1.4133730 |
| Au | -0.0279570 | -6.8238220 | -1.3217070 |
| Au | -5.7202900 | -2.2102450 | 0.8725870  |
| Au | -3.2617370 | -3.7342480 | 0.9455020  |
| Au | -3.1510680 | -0.8656090 | 0.8736410  |
| Au | -0.7294540 | -2.4011700 | 0.9264340  |
| Au | 1.7290990  | -3.9251730 | 0.9993490  |
| Au | 1.8397150  | -1.0566180 | 0.9274890  |
| Au | -3.0585890 | 2.0156320  | 0.8069260  |
| Au | -0.6000360 | 0.4916300  | 0.8798400  |
| Au | -0.4893670 | 3.3602690  | 0.8079790  |
| Au | 1.9322470  | 1.8247070  | 0.8607720  |
| Au | 4.3908000  | 0.3007040  | 0.9336870  |
| Au | -0.8219860 | -5.2824950 | 0.9931510  |
| Au | 4.2860090  | -2.5942790 | 0.9403620  |
| Au | -5.6027050 | 0.6828580  | 0.8146660  |
| Au | -4.9051860 | -0.7978090 | 3.1392560  |

|    |            |            |            |
|----|------------|------------|------------|
| Au | -2.4647880 | -2.3513730 | 3.1980300  |
| Au | -2.3212280 | 0.5167320  | 3.2003290  |
| Au | 0.0823780  | -1.0474290 | 3.2383630  |
| Au | 2.5226890  | -2.6009380 | 3.2972350  |
| Au | 2.6662810  | 0.2670260  | 3.2994380  |
| Au | -2.1955830 | 3.3975000  | 3.2077760  |
| Au | 0.2447280  | 1.8439920  | 3.2666480  |
| Au | 0.3883740  | 4.7120410  | 3.2688500  |
| Au | 2.7919780  | 3.1478810  | 3.3069830  |
| Au | 5.2322910  | 1.5943710  | 3.3657550  |
| Au | -0.0432670 | -3.9282010 | 3.2308160  |
| Au | 5.0949050  | -1.2984980 | 3.2978380  |
| Au | -4.7545370 | 2.0943060  | 3.1561060  |
| N  | -1.2396111 | 1.3277309  | -4.5727489 |
| N  | 1.6097440  | 1.4396560  | -4.4972411 |
| N  | 0.1094937  | 3.2997676  | -4.5290259 |
| N  | -3.0616356 | -0.2239908 | -4.6119923 |
| N  | 3.6119124  | 0.1333539  | -4.5255112 |
| N  | -1.0592550 | -1.5297309 | -4.6002708 |
| N  | 1.7929790  | -1.4165905 | -4.5706925 |
| N  | 0.4419232  | -3.3890933 | -4.5360831 |
| C  | -2.3657546 | 3.2886149  | -4.6108586 |
| C  | 2.5602924  | 3.5405667  | -4.5387764 |
| C  | -3.3127380 | 2.2330458  | -4.6367295 |
| C  | 3.6079205  | 2.5924712  | -4.5279100 |
| C  | -1.0412458 | 2.6833749  | -4.5637346 |
| C  | 1.3167935  | 2.7605084  | -4.5135503 |
| C  | -2.5710154 | 0.9841989  | -4.6067146 |
| C  | 2.9545000  | 1.2788753  | -4.5081788 |
| C  | -3.0543823 | -2.6793381 | -4.5034417 |
| C  | 3.8633791  | -2.3250522 | -4.5300693 |

|   |            |            |            |
|---|------------|------------|------------|
| C | -2.0061311 | -3.6270549 | -4.4750151 |
| C | 2.9148006  | -3.3795105 | -4.5371885 |
| C | -2.4020471 | -1.3676564 | -4.5865740 |
| C | 3.1211844  | -1.0747298 | -4.5491376 |
| C | -0.7647813 | -2.8477580 | -4.5433825 |
| C | 1.5921130  | -2.7741132 | -4.5540650 |
| C | -2.7776788 | 4.6262923  | -4.6454605 |
| C | 2.8247481  | 4.9096164  | -4.6081191 |
| C | -4.6886516 | 2.4941780  | -4.6758100 |
| C | 4.9448632  | 2.9898261  | -4.5703104 |
| C | -4.1514912 | 4.8838216  | -4.6972951 |
| C | 4.1682711  | 5.3114659  | -4.6614644 |
| C | -5.0937524 | 3.8323122  | -4.7113939 |
| C | 5.2125836  | 4.3667047  | -4.6331929 |
| C | -4.3935821 | -3.0776735 | -4.4379049 |
| C | 5.2371880  | -2.5889245 | -4.4771310 |
| C | -2.2705049 | -4.9970881 | -4.3687348 |
| C | 3.3224230  | -4.7184984 | -4.5094809 |
| C | -4.6631486 | -4.4520421 | -4.3276697 |
| C | 5.6408953  | -3.9278025 | -4.4288411 |
| C | -3.6146182 | -5.3993507 | -4.2951692 |
| C | 4.6958143  | -4.9800366 | -4.4510456 |
| H | -0.4773919 | 0.6406849  | -4.4967982 |
| H | -2.0363708 | 5.4349791  | -4.6240251 |
| H | 2.0017902  | 5.6357303  | -4.6255047 |
| H | -5.4133258 | 1.6694443  | -4.6900316 |
| H | 5.7524669  | 2.2465826  | -4.5534433 |
| H | -4.5052046 | 5.9220529  | -4.7277756 |
| H | 4.4114786  | 6.3799474  | -4.7186517 |
| H | -6.1643630 | 4.0708399  | -4.7399633 |
| H | 6.2539145  | 4.7115524  | -4.6731223 |

|   |            |            |            |
|---|------------|------------|------------|
| H | -5.1997176 | -2.3324233 | -4.4672143 |
| H | 5.9648574  | -1.7673029 | -4.4589028 |
| H | -1.4473280 | -5.7238366 | -4.3622600 |
| H | 2.5776131  | -5.5242632 | -4.5346522 |
| H | -5.7043793 | -4.8008417 | -4.3011701 |
| H | 6.7112207  | -4.1662739 | -4.3824558 |
| H | -3.8585465 | -6.4674170 | -4.2288946 |
